# Supplementary material
Source: publisher figshare collection journal article supplement (https://acs.figshare.com/ndownloader/files/4649257)

## Supporting Information

### **Regioselective C–H Functionalization Directed by Removable Carboxyl Group: Palladium-Catalyzed Vinylation at the Unusual Position of Indole and Related Heteroaromatic Rings**

Atsushi Maehara, Hayato Tsurugi, Tetsuya Satoh,\* and Masahiro Miura\*

*Department of Applied Chemistry, Faculty of Engineering, Osaka University, Suita,  
Osaka 565-0871, Japan*

*e-mail: satoh@chem.eng.osaka-u.ac.jp; miura@chem.eng.osaka-u.ac.jp*

#### **List of Contents for Experimental Section**

General: S2

Experimental Procedures: S2 – S5

Characterization Data of Products: S5 – S7

References: S8

<sup>1</sup>H and <sup>13</sup>C NMR Spectra of Products: S9 – S22

## Experimental Section

**General.**  $^1\text{H}$  and  $^{13}\text{C}$  NMR spectra were recorded at 400 and 100 MHz, or 270 MHz and 68 MHz, respectively, for  $\text{CDCl}_3$  solutions. MS data were obtained by EI. GC analysis was carried out using a silicon OV-17 column (i. d. 2.6 mm x 1.5 m) or a CBP-1 capillary column (i. d. 0.5 mm x 25 m). GC-MS analysis was carried out using a CBP-1 capillary column (i. d. 0.25 mm x 25 m) on a Shimadzu QP-5050. All starting materials and other reagents are commercially available. The structures of all products listed below were unambiguously determined by  $^1\text{H}$  and  $^{13}\text{C}$  NMR with the aid of NOE, COSY, HMQC, and HMBC experiments.

Indole-3-carboxylic acids **1b**<sup>12</sup> and **1c-d**<sup>13</sup> were prepared according to published procedures. Other starting materials were commercially available.

### Experimental Procedures.

**Procedure for the Reaction of 1-Methylindole-3-carboxylic Acid (1a) with Butyl Acrylate (2a) (entry 5 in Table 1):** To a 20 mL two-necked flask were added 1-methylindole-3-carboxylic acid (**1a**) (0.4 mmol, 70 mg), butyl acrylate (**2a**) (1.2 mmol, 154 mg),  $\text{Pd}(\text{OAc})_2$  (0.02 mmol, 4.5 mg),  $\text{Cu}(\text{OAc})_2 \cdot \text{H}_2\text{O}$  (0.8 mmol, 160 mg),  $\text{LiOAc}$  (1.2 mmol, 79 mg), MS4A (400mg), 1-methylnaphthalene (ca. 50 mg) as internal standard, and DMAc (10 mL). The resulting mixture was stirred under  $\text{N}_2$  at 140 °C for 2 h. After cooling, the reaction mixture was extracted with  $\text{Et}_2\text{O}$  and dried over sodium sulfate. Product **3a** (73 mg, 71%) was isolated by thin-layer chromatography on silica gel using hexane-ethyl acetate (95:5, v/v).

**Procedure for the Reaction of 1-Methylindole-3-carboxylic Acid (1a) with Cyclohexyl Acrylate (2c) (entry 2 in Table 2):** To a 20 mL two-necked flask were added 1-methylindole-3-carboxylic acid (**1a**) (0.4 mmol, 70 mg), cyclohexyl acrylate (**2c**) (1.2 mmol, 185 mg),  $\text{Pd}(\text{OAc})_2$  (0.02 mmol, 4.5 mg),  $\text{Cu}(\text{OAc})_2 \cdot \text{H}_2\text{O}$  (0.8 mmol, 160 mg),  $\text{LiOAc}$  (1.2 mmol, 79 mg), MS4A (400mg), 1-methylnaphthalene (ca. 50 mg) as internal standard, and DMAc (10 mL). The resulting mixture was stirred under  $\text{N}_2$  at 140 °C for 4 h. After cooling, the reaction mixture was extracted with  $\text{Et}_2\text{O}$  and dried over sodium sulfate. Product **3c** (70 mg, 62%) was isolated by thin-layer chromatography on silica gel using hexane-ethyl acetate (95:5, v/v).

**Procedure for the Reaction of 1-Methylindole-3-carboxylic Acid (1a) with *t*-Butyl Acrylate (2d) (entry 3 in Table 2):** To a 20 mL two-necked flask were added 1-methylindole-3-carboxylic acid (**1a**) (0.4 mmol, 70 mg), *t*-butyl acrylate (**2d**) (1.2

mmol, 154 mg), Pd(OAc)<sub>2</sub> (0.02 mmol, 4.5 mg), Cu(OAc)<sub>2</sub>•H<sub>2</sub>O (0.8 mmol, 160 mg), LiOAc (1.2 mmol, 79 mg), MS4A (400mg), 1-methylnaphthalene (ca. 50 mg) as internal standard, and DMAc (10 mL). The resulting mixture was stirred under N<sub>2</sub> at 140 °C for 8 h. After cooling, the reaction mixture was extracted with Et<sub>2</sub>O and dried over sodium sulfate. Product **3d** (56 mg, 54%) was isolated by thin-layer chromatography on silica gel using hexane-ethyl acetate (95:5, v/v).

**Procedure for the Reaction of 1-(Methoxymethyl)indole-3-carboxylic Acid (1b) with Butyl Acrylate (2a) (entry 5 in Table 2):** To a 20 mL two-necked flask were added 1-(methoxymethyl)indole-3-carboxylic acid (**1b**) (0.4 mmol, 82 mg), butyl acrylate (**2a**) (1.2 mmol, 154 mg), Pd(OAc)<sub>2</sub> (0.02 mmol, 4.5 mg), Cu(OAc)<sub>2</sub>•H<sub>2</sub>O (0.8 mmol, 160 mg), LiOAc (1.2 mmol, 79 mg), MS4A (400mg), 1-methylnaphthalene (ca. 50 mg) as internal standard, and DMAc (10 mL). The resulting mixture was stirred under N<sub>2</sub> at 140 °C for 8 h. After cooling, the reaction mixture was extracted with Et<sub>2</sub>O and dried over sodium sulfate. Product **3f** (57 mg, 50%) was isolated by thin-layer chromatography on silica gel using hexane-ethyl acetate (95:5, v/v).

**Procedure for the Reaction of 1-Phenylindole-3-carboxylic Acid (1c) with Butyl Acrylate (2a) (entry 6 in Table 2):** To a 20 mL two-necked flask were added 1-phenylindole-3-carboxylic acid (**1c**) (0.4 mmol, 95 mg), butyl acrylate (**2a**) (1.2 mmol, 154 mg), Pd(OAc)<sub>2</sub> (0.02 mmol, 4.5 mg), Cu(OAc)<sub>2</sub>•H<sub>2</sub>O (0.8 mmol, 160 mg), LiOAc (1.2 mmol, 79 mg), MS4A (400mg), 1-methylnaphthalene (ca. 50 mg) as internal standard, and DMAc (10 mL). The resulting mixture was stirred under N<sub>2</sub> at 140 °C for 8 h. After cooling, the reaction mixture was extracted with Et<sub>2</sub>O and dried over sodium sulfate. Product **3g** (54 mg, 43%) was isolated by thin-layer chromatography on silica gel using hexane-ethyl acetate (95:5, v/v).

**Procedure for the Reaction of 1-(4-Methylphenyl)indole-3-carboxylic Acid (1d) with Butyl Acrylate (2a) (entry 7 in Table 2):** To a 20 mL two-necked flask were added 1-(4-methylphenyl)indole-3-carboxylic acid (**1d**) (0.4 mmol, 100 mg), butyl acrylate (**2a**) (1.2 mmol, 154 mg), Pd(OAc)<sub>2</sub> (0.02 mmol, 4.5 mg), Cu(OAc)<sub>2</sub>•H<sub>2</sub>O (0.8 mmol, 160 mg), LiOAc (1.2 mmol, 79 mg), MS4A (400mg), 1-methylnaphthalene (ca. 50 mg) as internal standard, and DMAc (10 mL). The resulting mixture was stirred under N<sub>2</sub> at 140 °C for 4 h. After cooling, the reaction mixture was extracted with Et<sub>2</sub>O and dried over sodium sulfate. Product **3h** (52 mg, 39%) was isolated by thin-layer chromatography on silica gel using hexane-ethyl

acetate (95:5, v/v).

**Procedure for the Reaction of 1-Methylpyrrole-2-carboxylic Acid (6b) with Butyl Acrylate (2a) (entry 2 in Table 3):** To a 20 mL two-necked flask were added 1-methylpyrrole-2-carboxylic acid (**6b**) (0.4 mmol, 50 mg), butyl acrylate (**2a**) (1.2 mmol, 154 mg), Pd(OAc)<sub>2</sub> (0.02 mmol, 4.5 mg), Cu(OAc)<sub>2</sub>•H<sub>2</sub>O (0.8 mmol, 160 mg), LiOAc (1.2 mmol, 79 mg), MS4A (400mg), 1-methylnaphthalene (ca. 50 mg) as internal standard, and DMAc (10 mL). The resulting mixture was stirred under N<sub>2</sub> at 140 °C for 1 h. After cooling, the reaction mixture was extracted with Et<sub>2</sub>O and dried over sodium sulfate. Product **7b** (52 mg, 62%) was isolated by thin-layer chromatography on silica gel using hexane-ethyl acetate (95:5, v/v).

**Procedure for the Reaction of Benzo[*b*]furan-2-carboxylic Acid (6c) with Butyl Acrylate (2a) (entry 3 in Table 3):** To a 20 mL two-necked flask were added benzo[*b*]furan-2-carboxylic acid (**6c**) (0.4 mmol, 65 mg), butyl acrylate (**2a**) (1.2 mmol, 154 mg), Pd(OAc)<sub>2</sub> (0.02 mmol, 4.5 mg), Cu(OAc)<sub>2</sub>•H<sub>2</sub>O (0.8 mmol, 160 mg), LiOAc (1.2 mmol, 79 mg), MS4A (400mg), 1-methylnaphthalene (ca. 50 mg) as internal standard, and DMAc (10 mL). The resulting mixture was stirred under N<sub>2</sub> at 140 °C for 4 h. After cooling, the reaction mixture was extracted with Et<sub>2</sub>O and dried over sodium sulfate. **7c** (36 mg, 37%) was obtained as a mixture of C3- and C2-vinylated products (C3:C2 > 95:5) by thin-layer chromatography on silica gel using hexane-ethyl acetate (95:5, v/v).

**Procedure for the Reaction of Benzo[*b*]thiophene-2-carboxylic Acid (6d) with Butyl Acrylate (2a) (entry 4 in Table 3):** To a 20 mL two-necked flask were added benzo[*b*]thiophene-2-carboxylic acid (**6d**) (0.4 mmol, 71 mg), butyl acrylate (**2a**) (1.2 mmol, 154 mg), Pd(OAc)<sub>2</sub> (0.02 mmol, 4.5 mg), Cu(OAc)<sub>2</sub>•H<sub>2</sub>O (0.8 mmol, 160 mg), LiOAc (1.2 mmol, 79 mg), MS4A (400mg), 1-methylnaphthalene (ca. 50 mg) as internal standard, and DMAc (10 mL). The resulting mixture was stirred under N<sub>2</sub> at 120 °C for 4 h. After cooling, the reaction mixture was extracted with Et<sub>2</sub>O and dried over sodium sulfate. **7d** (35 mg, 34%) was obtained as a mixture of C3- and C2-vinylated products (C3:C2 = 7:1) by thin-layer chromatography on silica gel using hexane-ethyl acetate (95:5, v/v).

**Procedure for the Reaction of Furan-2-carboxylic Acid (6e) with Butyl Acrylate (2a) (entry 5 in Table 3):** To a 20 mL two-necked flask were added furan-2-carboxylic acid (**6e**) (0.4 mmol, 45 mg), butyl acrylate (**2a**) (1.2 mmol, 154

mg), Pd(OAc)<sub>2</sub> (0.02 mmol, 4.5 mg), Cu(OAc)<sub>2</sub>•H<sub>2</sub>O (0.8 mmol, 160 mg), LiOAc (1.2 mmol, 79 mg), MS4A (400mg), 1-methylnaphthalene (ca. 50 mg) as internal standard, and DMAc (10 mL). The resulting mixture was stirred under N<sub>2</sub> at 140 °C for 5 h. After cooling, the reaction mixture was extracted with Et<sub>2</sub>O and dried over sodium sulfate. **7e** (23 mg, 30%) was obtained as a mixture of C3- and C2-vinylated products (C3:C2 = ~1:1) by thin-layer chromatography on silica gel using hexane-ethyl acetate (95:5, v/v).

#### Characterization Data of Products.

**Butyl (*E*)-3-(1-Methylindol-2-yl)-2-propenoate (3a):** <sup>1</sup>H NMR (400 MHz, CDCl<sub>3</sub>)  $\delta$  0.97 (t, *J* = 7.3 Hz, 3H), 1.39-1.49 (m, 2H), 1.66-1.73 (m, 2H), 3.75 (s, 3H), 4.22 (t, *J* = 6.5 Hz, 2H), 6.46 (d, *J* = 15.6 Hz, 1H), 6.92 (s, 1H), 7.09 (t, *J* = 8.0 Hz, 1H), 7.21-7.27 (m, 2H), 7.58 (d, *J* = 8.0 Hz, 1H), 7.76 (d, *J* = 15.6 Hz, 1H); <sup>13</sup>C NMR (100 MHz, CDCl<sub>3</sub>)  $\delta$  13.8, 19.3, 30.0, 30.9, 64.5, 103.7, 109.6, 118.2, 120.5, 121.4, 123.6, 127.5, 132.6, 135.0, 139.1, 167.2; HRMS *m/z* (M<sup>+</sup>) Calcd for C<sub>16</sub>H<sub>19</sub>NO<sub>2</sub>: 257.1416. Found 257.1413.

**Ethyl (*E*)-3-(1-Methylindol-2-yl)-2-propenoate (3b):** mp 84-87 °C (lit.<sup>14</sup> 119 °C); <sup>1</sup>H NMR (400 MHz, CDCl<sub>3</sub>)  $\delta$  1.35 (t, *J* = 7.0 Hz, 3H), 3.80 (s, 3H), 4.28 (q, 2H), 6.47 (d, *J* = 15.8 Hz, 1H), 6.94 (s, 1H), 7.11 (t, *J* = 8.1 Hz, 1H), 7.23-7.31 (m, 2H), 7.60 (d, *J* = 8.1 Hz, 1H), 7.78 (d, *J* = 15.8 Hz, 1H); <sup>13</sup>C NMR (100 MHz, CDCl<sub>3</sub>)  $\delta$  14.3, 30.0, 60.5, 103.7, 109.6, 118.2, 120.4, 121.3, 123.5, 127.4, 132.6, 134.9, 139.0, 167.0; HRMS *m/z* (M<sup>+</sup>) Calcd for C<sub>14</sub>H<sub>15</sub>NO<sub>2</sub>: 229.1103. Found 229.1100.

**Cyclohexyl (*E*)-3-(1-Methylindol-2-yl)-2-propenoate (3c):** <sup>1</sup>H NMR (400 MHz, CDCl<sub>3</sub>)  $\delta$  1.26-1.60 (m, 6H), 1.77-1.80 (m, 2H), 1.92-1.96 (m, 2H), 3.83 (s, 3H), 4.87-4.94 (m, 1H), 6.48 (d, *J* = 15.8 Hz, 1H), 6.95 (s, 1H), 7.11 (t, *J* = 8.1 Hz, 1H), 7.26 (dd, *J* = 8.1, 8.4 Hz, 1H), 7.31 (d, *J* = 8.4 Hz, 1H), 7.61 (d, *J* = 8.1 Hz, 1H), 7.78 (d, *J* = 15.8 Hz, 1H); <sup>13</sup>C NMR (100 MHz, CDCl<sub>3</sub>)  $\delta$  23.9, 25.4, 30.1, 31.8, 72.8, 103.6, 109.6, 118.9, 120.4, 121.3, 123.5, 127.5, 132.4, 135.0, 139.0, 166.5; HRMS *m/z* (M<sup>+</sup>) Calcd for C<sub>18</sub>H<sub>21</sub>NO<sub>2</sub>: 283.1572. Found 283.1590.

***t*-Butyl (*E*)-3-(1-Methylindol-2-yl)-2-propenoate (3d):** <sup>1</sup>H NMR (400 MHz, CDCl<sub>3</sub>)  $\delta$  1.55 (s, 9H), 3.79 (s, 3H), 6.42 (d, *J* = 16.0 Hz, 1H), 6.92 (s, 1H), 7.08-7.12 (m, 1H), 7.22-7.31 (m, 2H), 7.59 (d, *J* = 8.0 Hz, 1H), 7.70 (d, *J* = 16.0 Hz, 1H); <sup>13</sup>C NMR (100 MHz, CDCl<sub>3</sub>)  $\delta$  28.3, 30.0, 80.6, 103.3, 109.6, 120.3, 120.4, 121.3, 123.4,

127.5, 131.7, 135.2, 139.0, 166.40; HRMS  $m/z$  ( $M^+$ ) Calcd for  $C_{16}H_{19}NO_2$ : 257.1416. Found 257.1413.

**(*E*)-1-Methyl-3-(2-phenylethenyl)indole (3e):** mp 114-118 °C (lit.<sup>15</sup> 119 °C);  $^1H$  NMR (400 MHz,  $CDCl_3$ )  $\delta$  3.80 (s, 3H), 6.80 (s, 1H), 7.07-7.12 (m, 1H), 7.16-7.30 (m, 5H), 7.35-7.39 (m, 2H), 7.51-7.53 (m, 2H), 7.58 (d,  $J$  = 8.1 Hz, 1H);  $^{13}C$  NMR (100 MHz,  $CDCl_3$ )  $\delta$  29.9, 99.0, 109.1, 117.0, 119.9, 120.4, 121.7, 126.4, 127.8, 128.8, 130.1, 130.9, 137.1, 138.1, 138.4; HRMS  $m/z$  ( $M^+$ ) Calcd for  $C_{17}H_{15}N$ : 233.1204. Found 233.1202.

**Butyl (*E*)-3-[1-(Methoxymethyl)indol-2-yl]-2-propenoate (3f):**  $^1H$  NMR (400 MHz,  $CDCl_3$ )  $\delta$  0.97 (t,  $J$  = 7.3 Hz, 3H), 1.40-1.49 (m, 2H), 1.66-1.74 (m, 2H), 3.27 (s, 3H), 4.22 (t,  $J$  = 6.6 Hz, 2H), 5.54 (s, 2H), 6.53 (d,  $J$  = 15.8 Hz, 1H), 6.99 (s, 1H), 7.13-7.17 (m, 1H), 7.26-7.30 (m, 1H), 7.44 (d,  $J$  = 8.1 Hz, 1H), 7.61 (d,  $J$  = 7.7 Hz, 1H), 7.82 (d,  $J$  = 15.8 Hz, 1H);  $^{13}C$  NMR (100 MHz,  $CDCl_3$ )  $\delta$  13.8, 19.2, 30.8, 55.9, 64.6, 73.8, 105.9, 109.8, 119.2, 121.2, 121.5, 124.2, 127.8, 132.4, 135.2, 139.3, 167.0; HRMS  $m/z$  ( $M^+$ ) Calcd for  $C_{17}H_{21}NO_3$ : 287.1521. Found 287.1516.

**Butyl (*E*)-3-(1-Phenylindol-2-yl)-2-propenoate (3g):**  $^1H$  NMR (400 MHz,  $CDCl_3$ )  $\delta$  0.93 (t,  $J$  = 7.3 Hz, 3H), 1.33-1.43 (m, 2H), 1.59-1.66 (m, 2H), 4.14 (t,  $J$  = 6.6 Hz, 2H), 6.28 (d,  $J$  = 15.8 Hz, 1H), 7.09 (s, 1H), 7.13-7.21 (m, 3H), 7.35 (d,  $J$  = 7.3 Hz, 2H), 7.47-7.57 (m, 4H), 7.66 (d,  $J$  = 7.7 Hz, 1H);  $^{13}C$  NMR (100 MHz,  $CDCl_3$ )  $\delta$  13.8, 19.2, 30.8, 64.4, 105.1, 110.8, 118.2, 121.2, 121.3, 124.1, 127.6, 128.3, 128.4, 129.8, 133.4, 135.3, 136.9, 139.8, 167.0; HRMS  $m/z$  ( $M^+$ ) Calcd for  $C_{21}H_{21}NO_2$ : 319.1572. Found 319.1568.

**Butyl (*E*)-3-[1-(4-Methylphenyl)indol-2-yl]-2-propenoate (3h):**  $^1H$  NMR (400 MHz,  $CDCl_3$ )  $\delta$  0.93 (t,  $J$  = 7.3 Hz, 3H), 1.34-1.43 (m, 2H), 1.58-1.67 (m, 2H), 2.46 (s, 3H), 4.14 (t,  $J$  = 6.6 Hz, 2H), 6.29 (d,  $J$  = 15.8 Hz, 1H), 7.07 (s, 1H), 7.11-7.24 (m, 5H), 7.33 (d,  $J$  = 8.1 Hz, 2H), 7.49 (d,  $J$  = 15.8 Hz, 1H), 7.65 (d,  $J$  = 7.7 Hz, 1H);  $^{13}C$  NMR (100 MHz,  $CDCl_3$ )  $\delta$  13.7, 19.2, 21.2, 30.7, 64.3, 104.7, 110.8, 118.1, 121.0, 121.2, 123.9, 127.5, 128.0, 130.3, 133.5, 134.2, 135.4, 138.4, 139.8, 167.0; HRMS  $m/z$  ( $M^+$ ) Calcd for  $C_{22}H_{23}NO_2$ : 333.1729. Found 333.1737.

**Butyl (*E*)-3-(1-Methylindol-3-yl)-2-propenoate (5 = 7a):**<sup>3</sup>  $^1H$  NMR (400 MHz,  $CDCl_3$ )  $\delta$  0.97 (t,  $J$  = 7.3 Hz, 3H), 1.41-1.50 (m, 2H), 1.66-1.73 (m, 2H), 3.75 (s, 3H), 4.21 (t,  $J$  = 6.5 Hz, 2H), 6.40 (d,  $J$  = 16.0 Hz, 1H), 7.22-7.32 (m, 4H), 7.85-7.91 (m, 2H);  $^{13}C$  NMR (100 MHz,  $CDCl_3$ )  $\delta$  13.8, 19.3, 31.0, 33.1, 64.0, 109.9, 112.1, 112.6,

120.6, 121.3, 122.9, 126.1, 133.1, 137.9, 138.1, 168.5; HRMS  $m/z$  ( $M^+$ ) Calcd for  $C_{16}H_{19}NO_2$ : 257.1416. Found 257.1418.

**Butyl (*E*)-3-(1-Methylpyrrol-3-yl)-2-propenoate (7b):**  $^1H$  NMR (400 MHz,  $CDCl_3$ )  $\delta$  0.95 (t,  $J = 7.3$  Hz, 3H), 1.38-1.47 (m, 2H), 1.63-1.70 (m, 2H), 3.67 (s, 3H), 4.16 (t,  $J = 6.6$  Hz, 2H), 6.07 (d,  $J = 15.8$  Hz, 1H), 6.36-6.37 (m, 1H), 6.57 (t,  $J = 2.6$  Hz, 1H), 6.83 (t,  $J = 1.8$  Hz, 1H), 7.58 (d,  $J = 15.8$  Hz, 1H);  $^{13}C$  NMR (100 MHz,  $CDCl_3$ )  $\delta$  13.7, 19.2, 30.9, 36.3, 63.8, 106.9, 112.8, 120.8, 123.8, 124.9, 138.7, 168.2; HRMS  $m/z$  ( $M^+$ ) Calcd for  $C_{12}H_{17}NO_2$ : 207.1259. Found 207.1263.

**Butyl (*E*)-3-(Benzo[*b*]furan-3-yl)-2-propenoate (7c):**  $^1H$  NMR (400 MHz,  $CDCl_3$ )  $\delta$  0.98 (t,  $J = 7.3$  Hz, 3H), 1.41-1.50 (m, 2H), 1.67-1.74 (m, 2H), 4.23 (t,  $J = 6.5$  Hz, 2H), 6.56 (d,  $J = 16.0$  Hz, 1H), 7.32-7.40 (m, 2H), 7.52-7.54 (m, 1H), 7.78 (d,  $J = 16.0$  Hz, 1H), 7.84-7.87 (m, 2H);  $^{13}C$  NMR (100 MHz,  $CDCl_3$ )  $\delta$  13.7, 19.2, 30.8, 64.5, 112.0, 117.9, 118.5, 121.0, 123.7, 124.8, 125.4, 134.4, 147.7, 156.1, 167.2; HRMS  $m/z$  ( $M^+$ ) Calcd for  $C_{15}H_{16}O_3$ : 244.1099. Found 244.1102.

**Butyl (*E*)-3-(Benzo[*b*]thien-3-yl)-2-propenoate (7d):**  $^1H$  NMR (400 MHz,  $CDCl_3$ )  $\delta$  0.98 (t,  $J = 7.3$  Hz, 3H), 1.41-1.51 (m, 2H), 1.68-1.75 (m, 2H), 4.24 (t,  $J = 6.6$  Hz, 2H), 6.54 (d,  $J = 15.8$  Hz, 1H), 7.39-7.48 (m, 2H), 7.75 (s, 1H), 7.88 (d,  $J = 7.3$  Hz, 1H), 7.96 (d,  $J = 15.8$  Hz, 1H), 8.02 (d,  $J = 8.1$  Hz, 1H);  $^{13}C$  NMR (100 MHz,  $CDCl_3$ )  $\delta$  13.7, 19.2, 30.8, 64.5, 118.7, 122.1, 123.0, 124.9, 125.0, 128.0, 131.7, 136.3, 137.1, 140.5, 167.2; HRMS  $m/z$  ( $M^+$ ) Calcd for  $C_{15}H_{16}O_2S$ : 260.0871. Found 260.0867.

**Butyl (*E*)-3-(Furanyl)-2-propenoate (7e):**  $^1H$  NMR (400 MHz,  $CDCl_3$ )  $\delta$  0.96 (t,  $J = 7.3$  Hz, 3H), 1.38-1.47 (m, 4H), 1.64-1.71 (m, 4H), 4.17-4.21 (m, 4H), 6.16 (d,  $J = 15.8$  Hz, 1H), 6.32 (d,  $J = 15.8$  Hz, 1H), 6.46 (dd,  $J = 1.8, 1.8$  Hz, 1H), 6.59-6.61 (m, 2H), 7.40-7.44 (m, 2H), 7.48 (d,  $J = 1.8$  Hz, 1H), 7.57 (d,  $J = 15.8$  Hz, 1H), 7.64 (s, 1H);  $^{13}C$  NMR (100 MHz,  $CDCl_3$ )  $\delta$  13.7, 19.2, 30.7, 64.3, 64.3, 107.4, 112.2, 114.5, 116.0, 118.0, 122.6, 130.9, 134.5, 144.3, 144.4, 144.6, 150.9, 167.06, 167.13; HRMS  $m/z$  ( $M^+$ ) Calcd for  $C_{11}H_{14}O_3$ : 194.0943. Found 194.0945.

**Butyl (*E*)-3-(Thien-3-yl)-2-propenoate (7f):**<sup>16</sup>  $^1H$  NMR (400 MHz,  $CDCl_3$ )  $\delta$  0.96 (t,  $J = 7.3$  Hz, 3H), 1.39-1.48 (m, 2H), 1.65-1.72 (m, 2H), 4.20 (t,  $J = 6.6$  Hz, 2H), 6.27 (d,  $J = 15.8$  Hz, 1H), 7.29-7.37 (m, 2H), 7.49-7.50 (m, 1H), 7.66 (d,  $J = 15.8$  Hz, 1H);  $^{13}C$  NMR (100 MHz,  $CDCl_3$ )  $\delta$  13.7, 19.2, 30.8, 64.3, 117.9, 125.1, 126.9, 127.9, 137.6, 138.0, 167.3; HRMS  $m/z$  ( $M^+$ ) Calcd for  $C_{11}H_{14}O_2S$ : 210.0715. Found 210.0724.

## References

- (3) Grimster, N. P.; Gauntlett, C.; Godfrey, C. R. A.; Gaunt, M. J. *Angew. Chem. Int. Ed.* **2005**, *44*, 3125.
- (12) Nakao, Y.; Kanyiva, K. S.; Oda, S.; Hiyama, T. *J. Am. Chem. Soc.* **2006**, *128*, 8146.
- (13) Antilla, J. C.; Klapars, A.; Buchwald, S. L. *J. Am. Chem. Soc.* **2002**, *124*, 11684.
- (14) Lewis, F. D.; Yang, J.-S. *J. Phys. Chem.* **1996**, *100*, 14560.
- (15) Simas, A. B. C.; Coelho, A. L.; Costa, P. R. R. *Synthesis* **1999**, 1017.
- (16) Feuerstein, M.; Doucet, H.; Santelli, M. *J. Org. Chem.* **2001**, *66*, 5923.



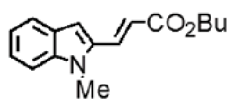

**3a** (CDCl<sub>3</sub>, 400 MHz)

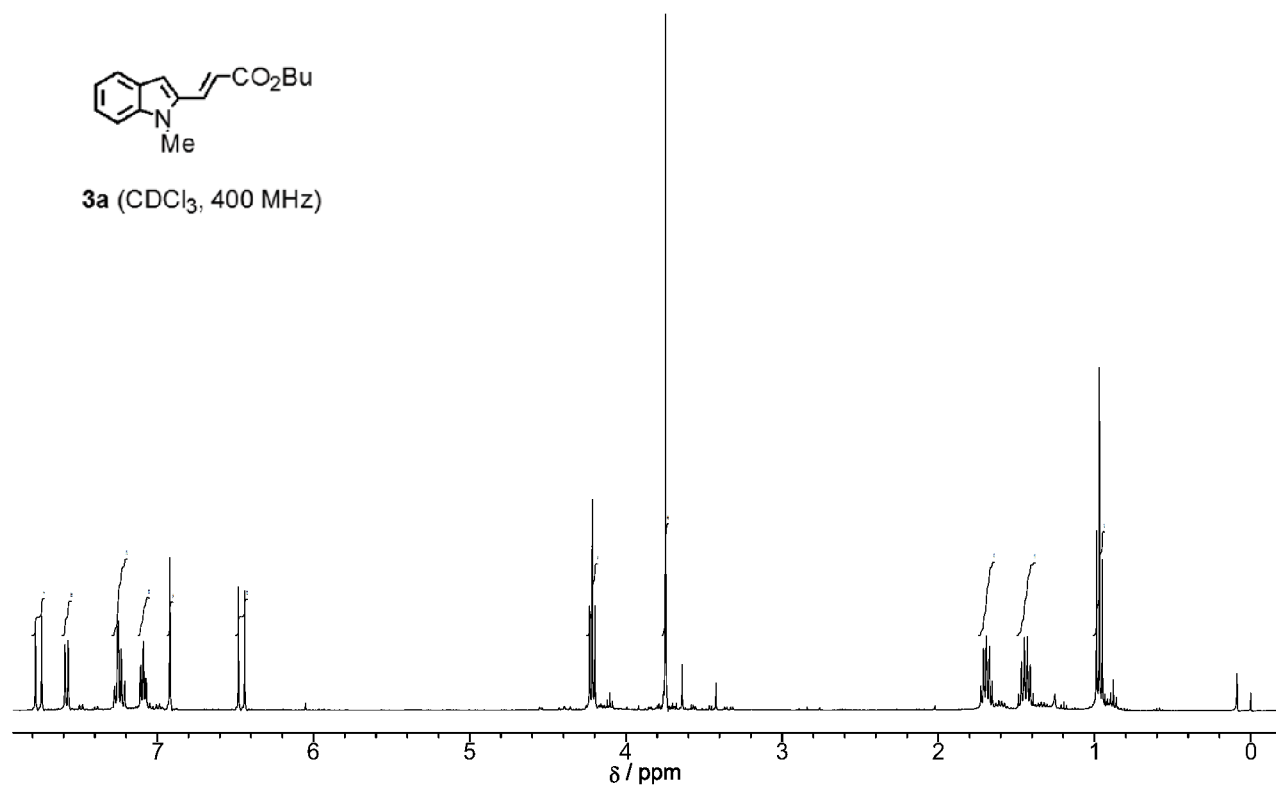

| No. | ppm    | Hz      | Height |
|-----|--------|---------|--------|
| 1   | 167.17 | 16639.1 | 35.83  |
| 2   | 139.06 | 13841.5 | 18.88  |
| 3   | 134.97 | 13434.4 | 39.11  |
| 4   | 132.64 | 13202.2 | 76.30  |
| 5   | 127.49 | 12690.1 | 36.12  |
| 6   | 123.59 | 12301.9 | 54.06  |
| 7   | 121.40 | 12083.5 | 82.54  |
| 8   | 120.45 | 11989.2 | 67.11  |
| 9   | 118.23 | 11768.5 | 82.60  |
| 10  | 109.64 | 10913.0 | 87.02  |
| 11  | 103.72 | 10324.0 | 55.55  |
| 12  | 77.44  | 7708.3  | 41.29  |
| 13  | 77.12  | 7676.4  | 44.02  |
| 14  | 76.80  | 7644.4  | 43.36  |
| 15  | 64.51  | 6420.6  | 70.50  |
| 16  | 30.86  | 3071.3  | 55.75  |
| 17  | 30.01  | 2986.8  | 55.39  |
| 18  | 19.25  | 1916.1  | 96.56  |
| 19  | 13.80  | 1373.4  | 100    |

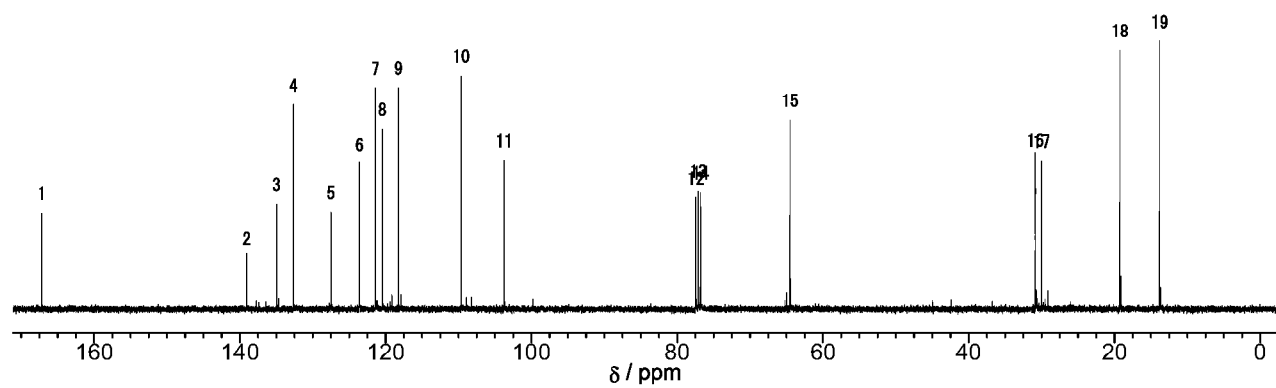

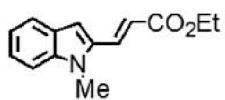

**3b** (CDCl<sub>3</sub>, 400 MHz)

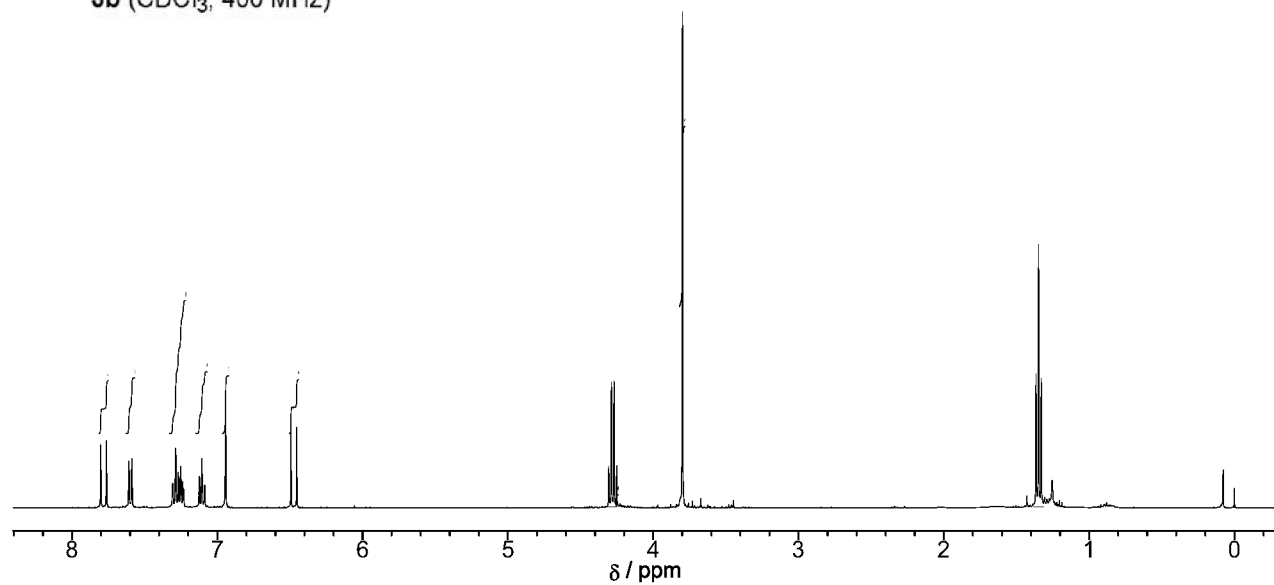

| No. | ppm    | Hz      | Height |
|-----|--------|---------|--------|
| 1   | 167.01 | 16788.9 | 31.62  |
| 2   | 138.99 | 13972.1 | 17.25  |
| 3   | 134.90 | 13560.9 | 31.47  |
| 4   | 132.60 | 13329.7 | 79.42  |
| 5   | 127.40 | 12807.1 | 25.84  |
| 6   | 123.54 | 12418.8 | 70.58  |
| 7   | 121.33 | 12196.8 | 68.48  |
| 8   | 120.39 | 12102.2 | 100    |
| 9   | 118.17 | 11879.4 | 94.45  |
| 10  | 109.57 | 11015.0 | 92.23  |
| 11  | 103.66 | 10420.7 | 92.30  |
| 12  | 77.32  | 7772.5  | 56.24  |
| 13  | 77.00  | 7740.5  | 55.21  |
| 14  | 76.69  | 7709.2  | 55.45  |
| 15  | 60.53  | 6084.9  | 69.12  |
| 16  | 30.01  | 3016.3  | 60.78  |
| 17  | 14.33  | 1440.1  | 78.68  |

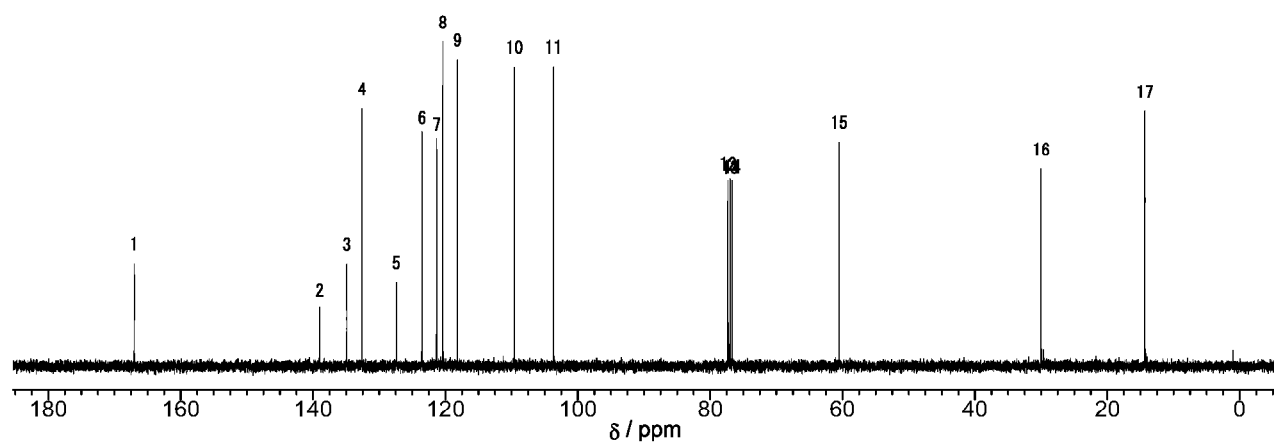

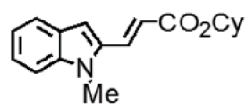

**3c** (CDCl<sub>3</sub>, 400 MHz)

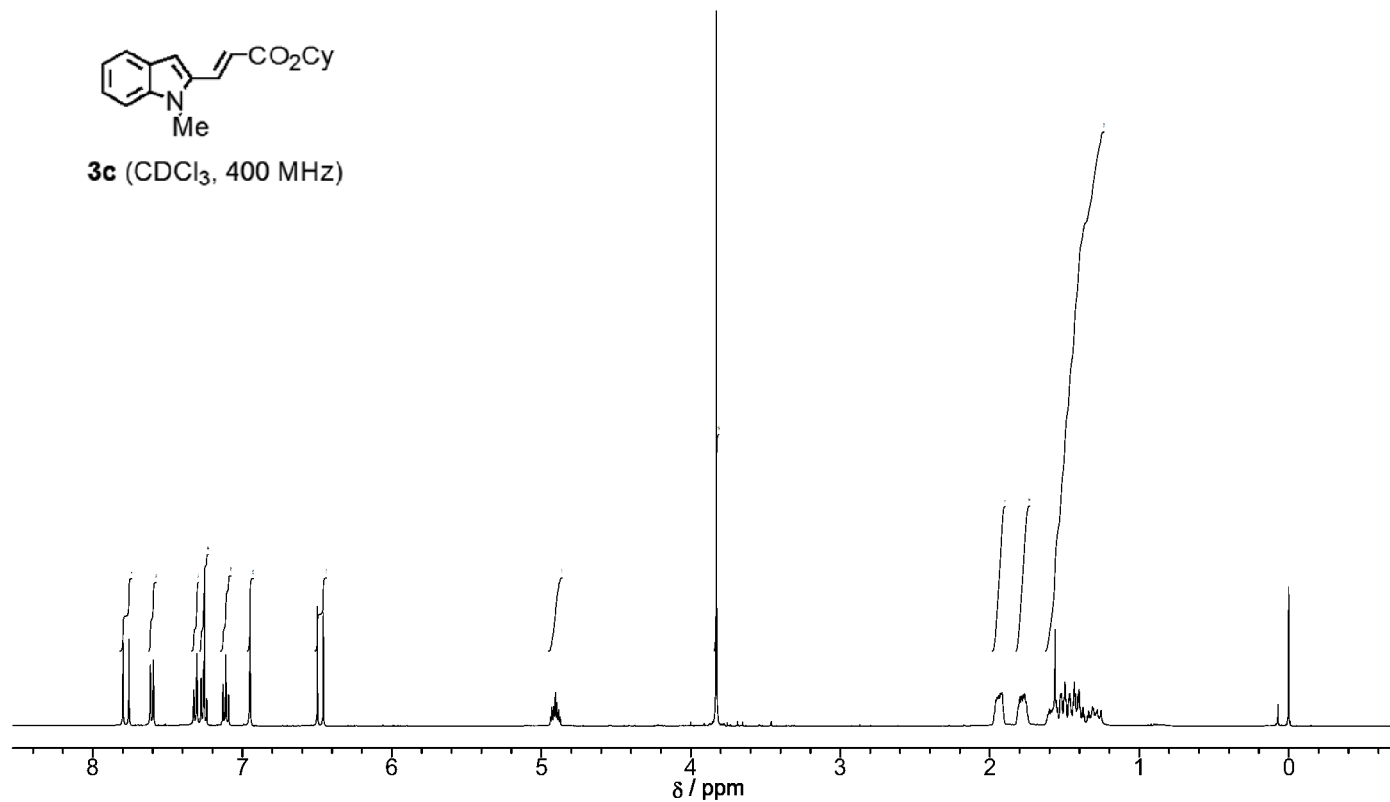

| No. | ppm    | Hz      | Height |
|-----|--------|---------|--------|
| 1   | 166.50 | 16737.8 | 21.30  |
| 2   | 138.99 | 13972.1 | 16.58  |
| 3   | 135.04 | 13575.4 | 17.99  |
| 4   | 132.36 | 13305.3 | 47.21  |
| 5   | 127.46 | 12812.5 | 25.38  |
| 6   | 123.49 | 12414.2 | 53.91  |
| 7   | 121.35 | 12198.3 | 46.58  |
| 8   | 120.38 | 12101.4 | 46.48  |
| 9   | 118.86 | 11948.8 | 52.87  |
| 10  | 109.59 | 11016.5 | 51.50  |
| 11  | 103.59 | 10413.8 | 37.50  |
| 12  | 77.36  | 7776.3  | 50.93  |
| 13  | 77.04  | 7744.3  | 51.86  |
| 14  | 76.72  | 7712.2  | 49.60  |
| 15  | 72.85  | 7323.1  | 31.34  |
| 16  | 31.78  | 3194.9  | 100    |
| 17  | 30.06  | 3021.7  | 25.76  |
| 18  | 25.44  | 2557.0  | 55.47  |
| 19  | 23.85  | 2397.6  | 66.76  |

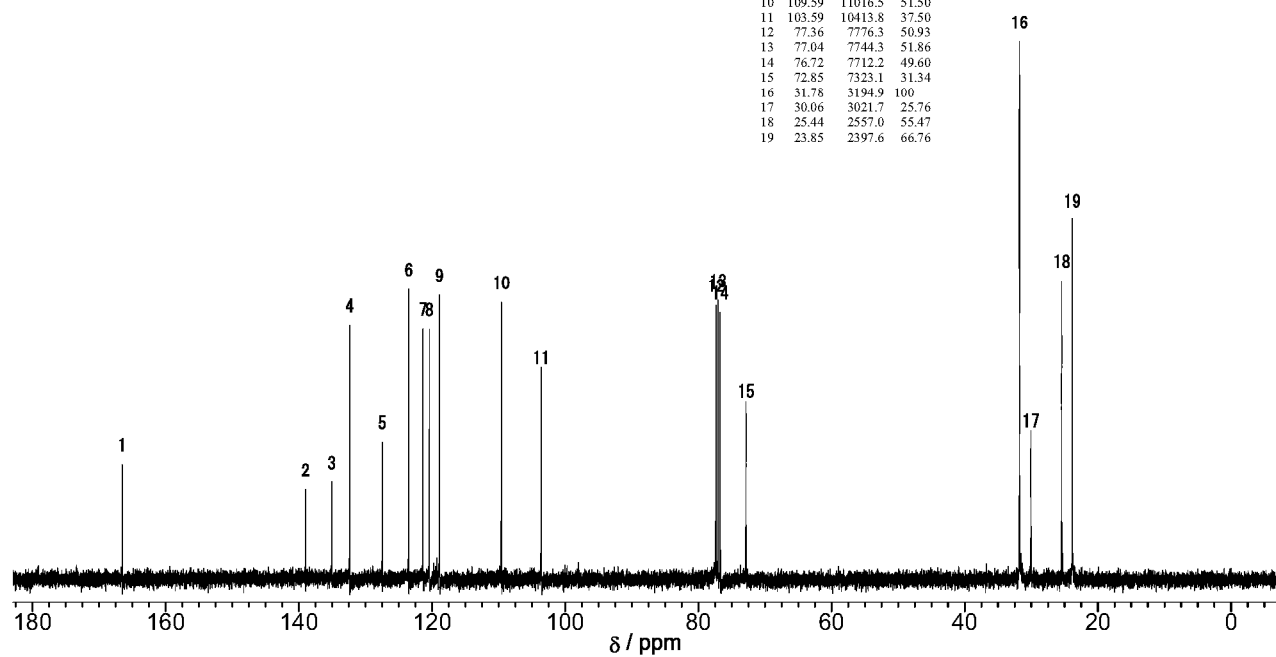

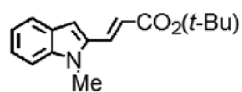

**3d** (CDCl<sub>3</sub>, 400 MHz)

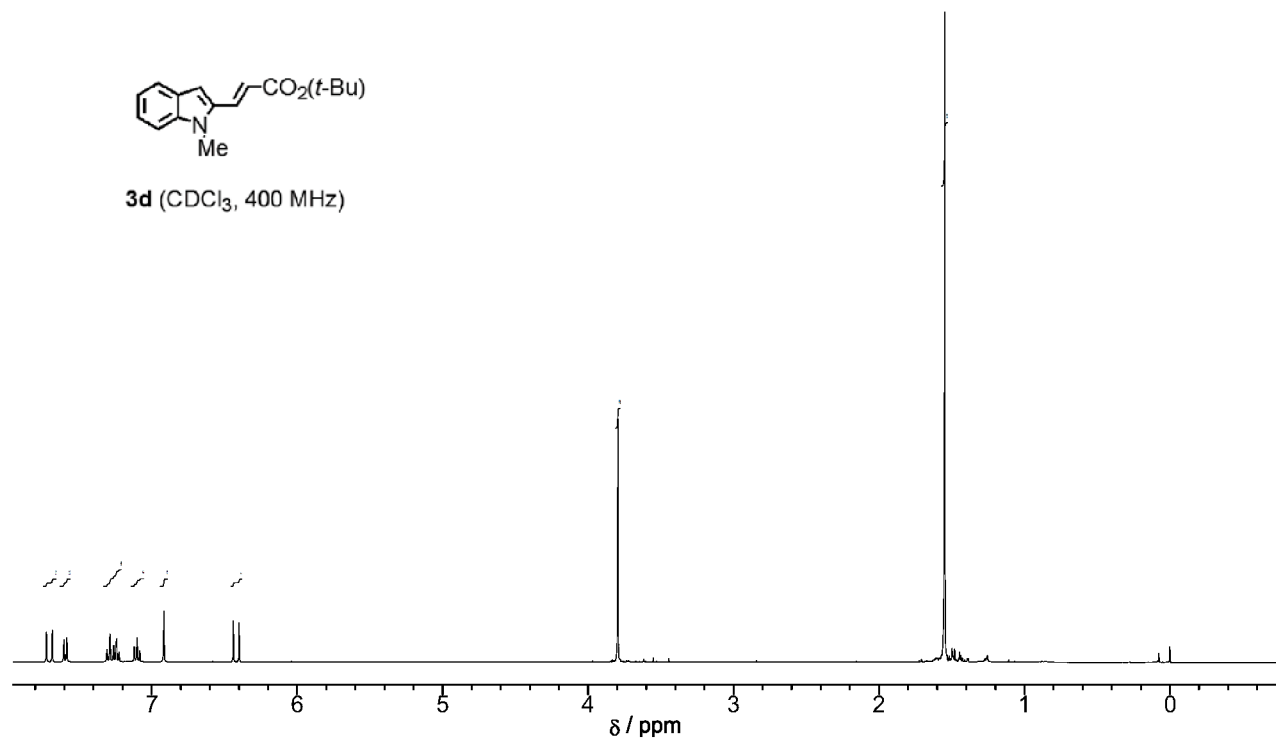

| No. | ppm    | Hz      | Height |
|-----|--------|---------|--------|
| 1   | 166.44 | 16566.3 | 18.40  |
| 2   | 138.97 | 13832.6 | 9.03   |
| 3   | 135.18 | 13455.1 | 14.47  |
| 4   | 131.70 | 13108.9 | 23.14  |
| 5   | 127.53 | 12693.3 | 8.48   |
| 6   | 123.40 | 12282.4 | 36.22  |
| 7   | 121.31 | 12074.6 | 28.62  |
| 8   | 120.36 | 11980.2 | 39.29  |
| 9   | 120.29 | 11972.6 | 26.55  |
| 10  | 109.59 | 10907.9 | 39.89  |
| 11  | 103.34 | 10286.2 | 32.88  |
| 12  | 80.63  | 8025.9  | 20.36  |
| 13  | 77.37  | 7700.9  | 44.47  |
| 14  | 77.05  | 7669.0  | 45.40  |
| 15  | 76.73  | 7637.0  | 44.79  |
| 16  | 30.01  | 2987.1  | 30.13  |
| 17  | 28.25  | 2812.0  | 100    |

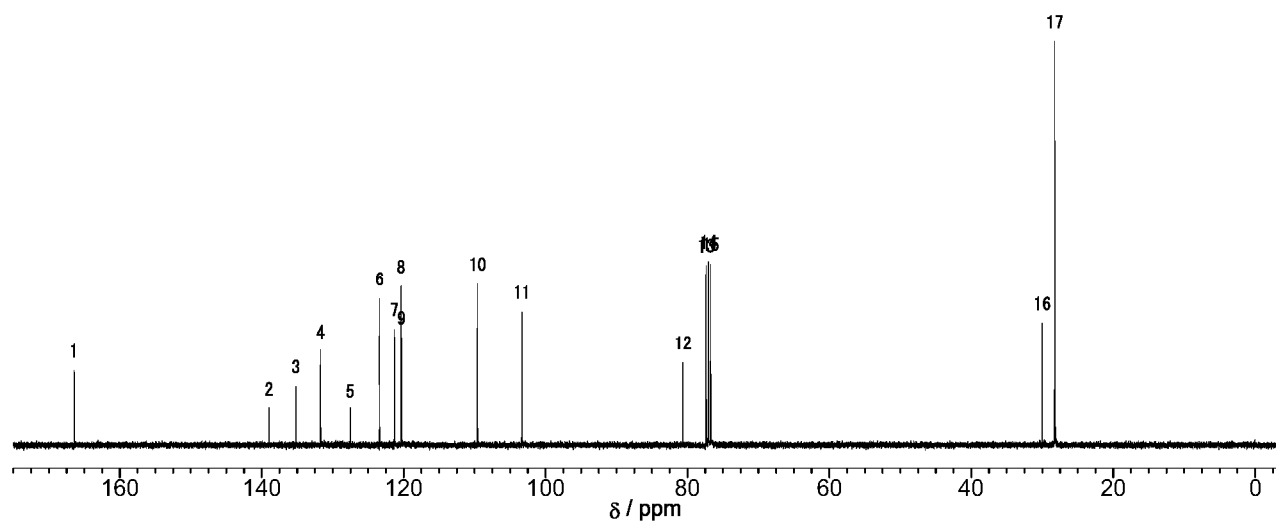

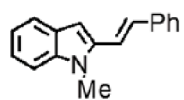

**3e** (CDCl<sub>3</sub>, 400 MHz)

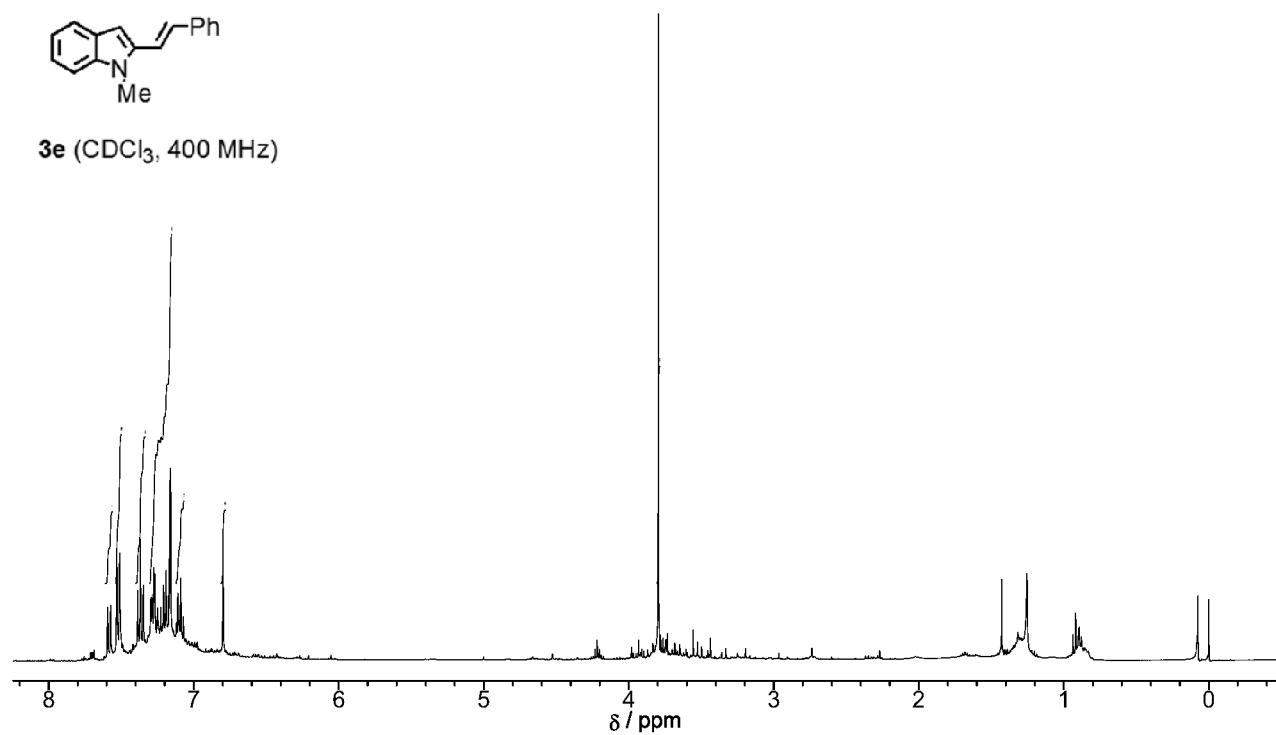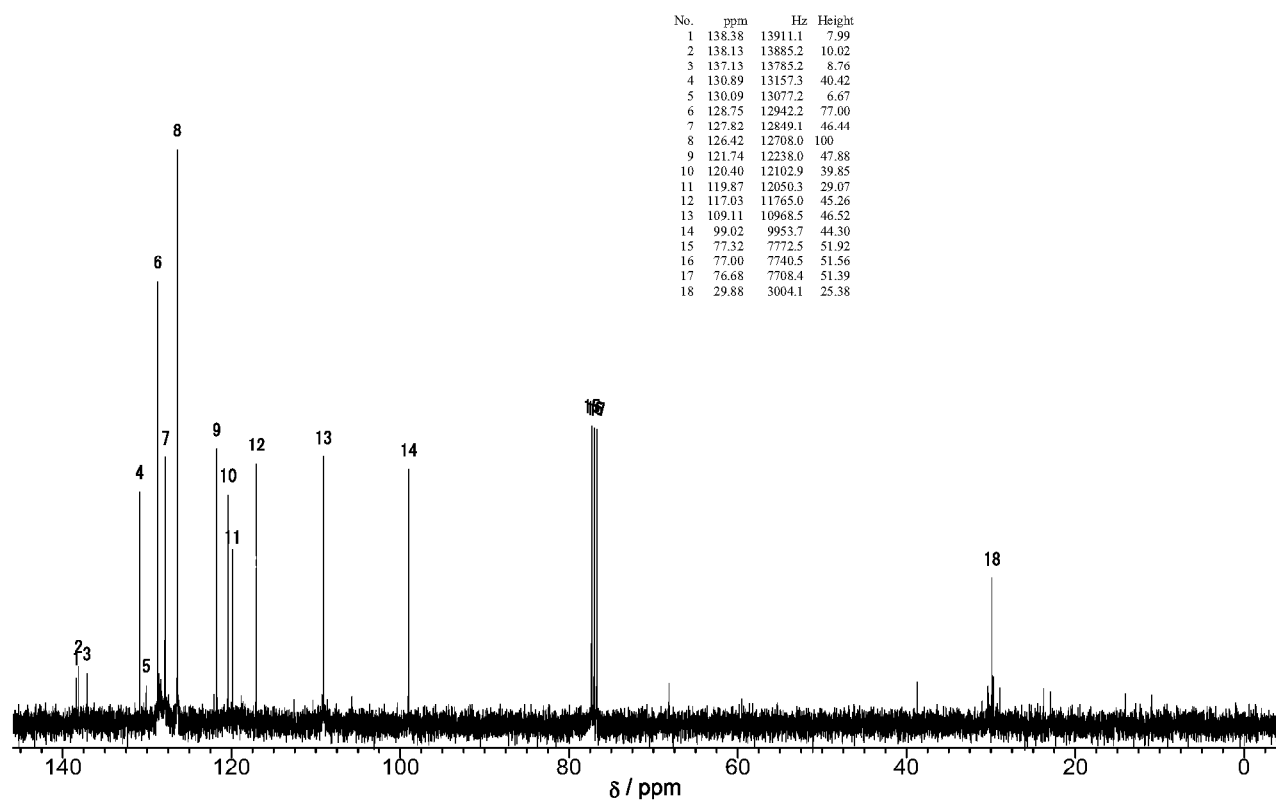

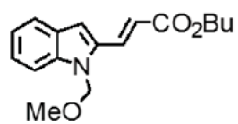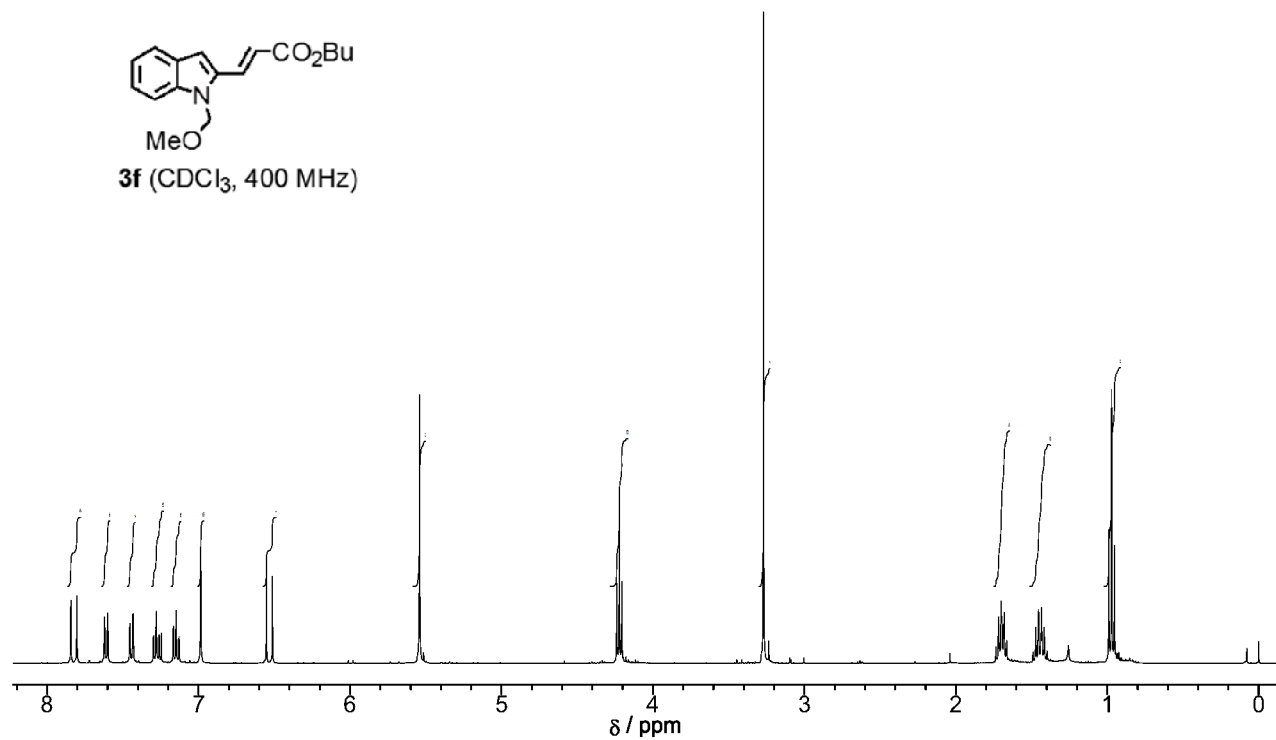

| No. | ppm    | Hz      | Height |
|-----|--------|---------|--------|
| 1   | 167.03 | 16790.8 | 44.48  |
| 2   | 139.29 | 14002.2 | 30.62  |
| 3   | 135.19 | 13590.2 | 38.83  |
| 4   | 132.42 | 13311.8 | 81.43  |
| 5   | 127.76 | 12843.3 | 36.56  |
| 6   | 124.18 | 12483.2 | 71.15  |
| 7   | 121.52 | 12215.4 | 97.93  |
| 8   | 121.20 | 12184.1 | 93.02  |
| 9   | 119.15 | 11977.4 | 91.10  |
| 10  | 109.84 | 11042.0 | 63.60  |
| 11  | 105.85 | 10640.7 | 73.22  |
| 12  | 77.39  | 7779.7  | 59.79  |
| 13  | 77.07  | 7747.7  | 61.58  |
| 14  | 76.75  | 7715.6  | 61.25  |
| 15  | 73.84  | 7422.6  | 79.51  |
| 16  | 64.55  | 6488.8  | 98.88  |
| 17  | 55.93  | 5622.1  | 66.43  |
| 18  | 30.82  | 3098.3  | 85.21  |
| 19  | 19.23  | 1933.3  | 69.69  |
| 20  | 13.78  | 1385.5  | 100    |

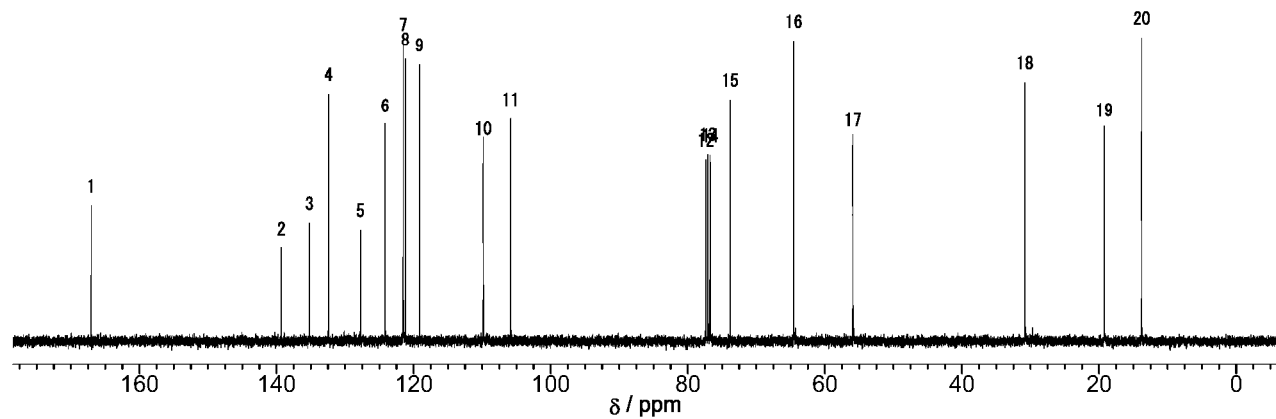

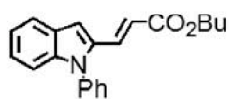

**3g** (CDCl<sub>3</sub>, 400 MHz)

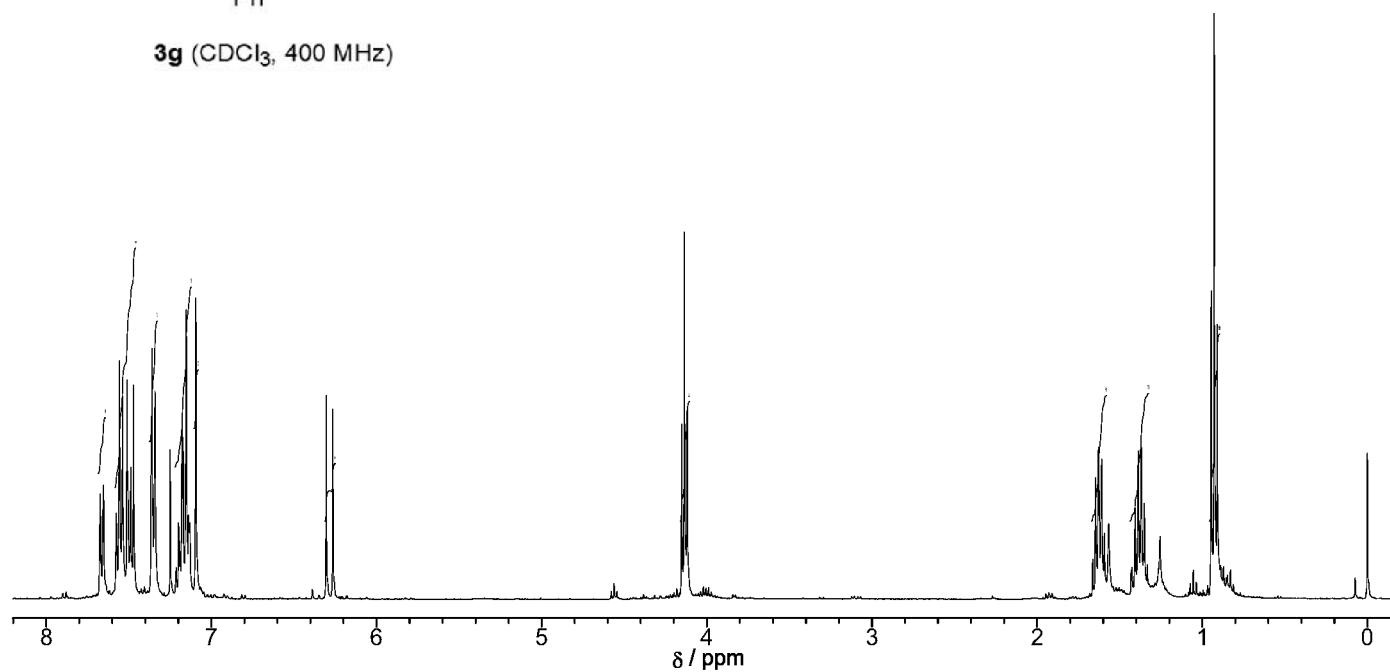

| No. | ppm    | Hz      | Height |
|-----|--------|---------|--------|
| 1   | 167.00 | 16787.7 | 20.13  |
| 2   | 139.78 | 14051.1 | 14.23  |
| 3   | 136.93 | 13765.0 | 12.60  |
| 4   | 135.34 | 13605.5 | 20.77  |
| 5   | 133.44 | 13414.0 | 40.52  |
| 6   | 129.75 | 13043.2 | 84.92  |
| 7   | 128.41 | 12908.9 | 42.31  |
| 8   | 128.31 | 12898.3 | 100    |
| 9   | 127.59 | 12825.8 | 22.80  |
| 10  | 124.08 | 12473.3 | 27.86  |
| 11  | 121.33 | 12196.3 | 37.81  |
| 12  | 121.18 | 12181.9 | 37.78  |
| 13  | 118.24 | 11886.6 | 33.40  |
| 14  | 110.81 | 11139.7 | 44.45  |
| 15  | 105.08 | 10562.9 | 32.49  |
| 16  | 77.38  | 7778.2  | 43.08  |
| 17  | 77.06  | 7746.1  | 43.69  |
| 18  | 76.75  | 7714.8  | 42.22  |
| 19  | 64.39  | 6472.8  | 33.97  |
| 20  | 30.75  | 3090.7  | 48.19  |
| 21  | 19.19  | 1928.7  | 38.25  |
| 22  | 13.75  | 1382.4  | 51.69  |

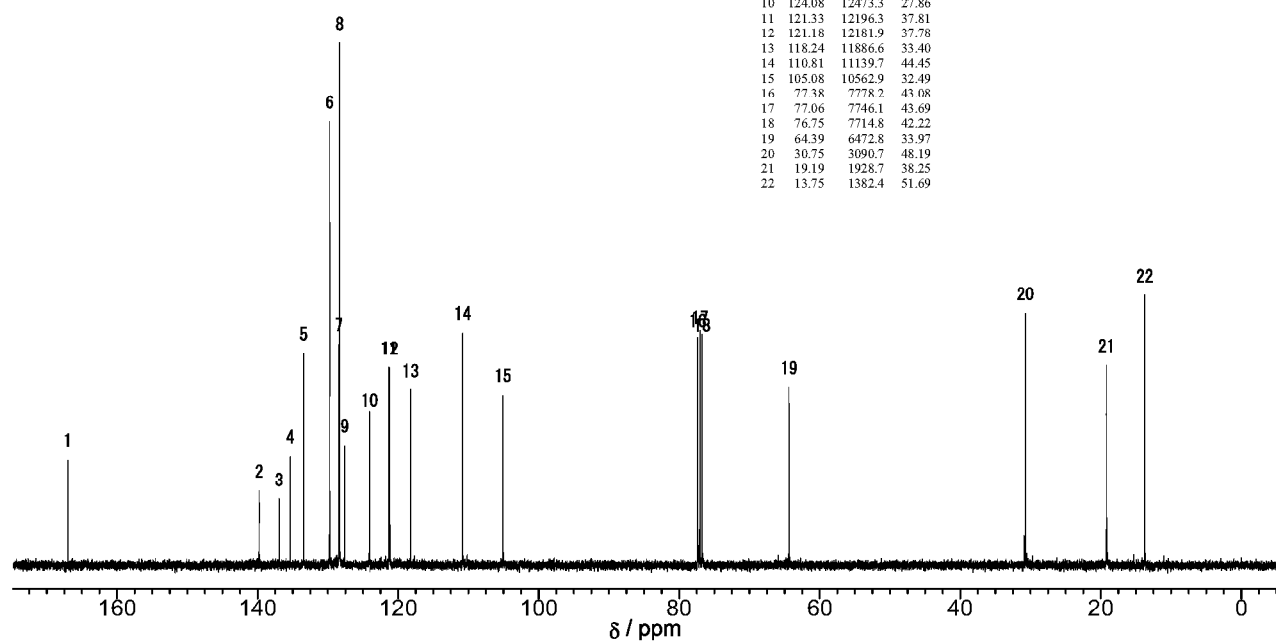

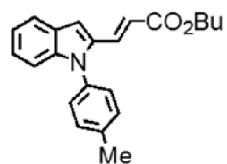

**3h** (CDCl<sub>3</sub>, 400 MHz)

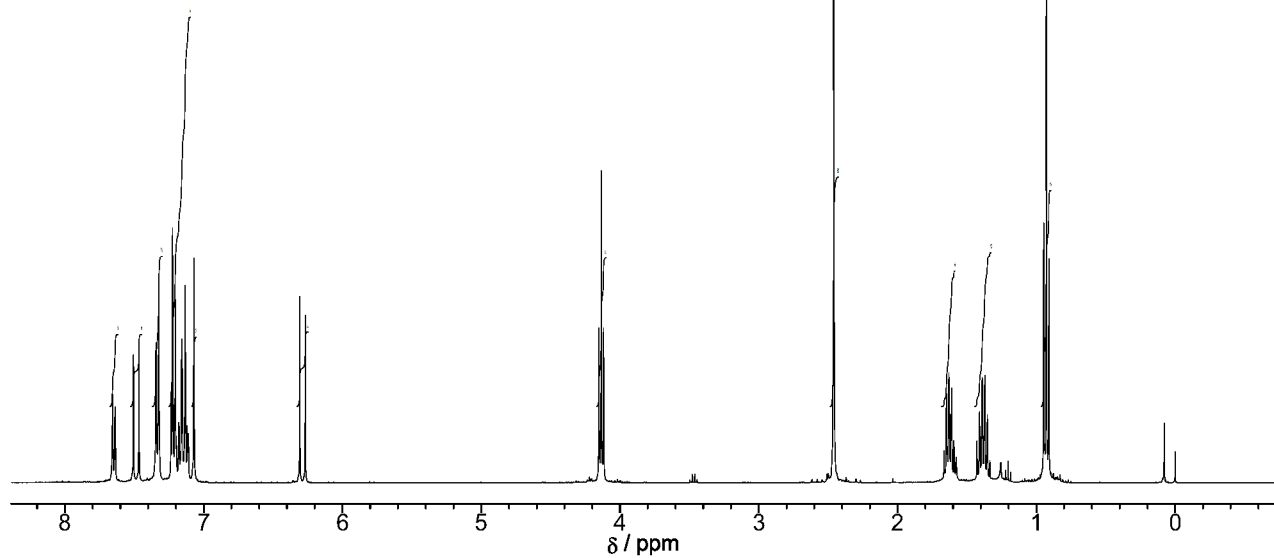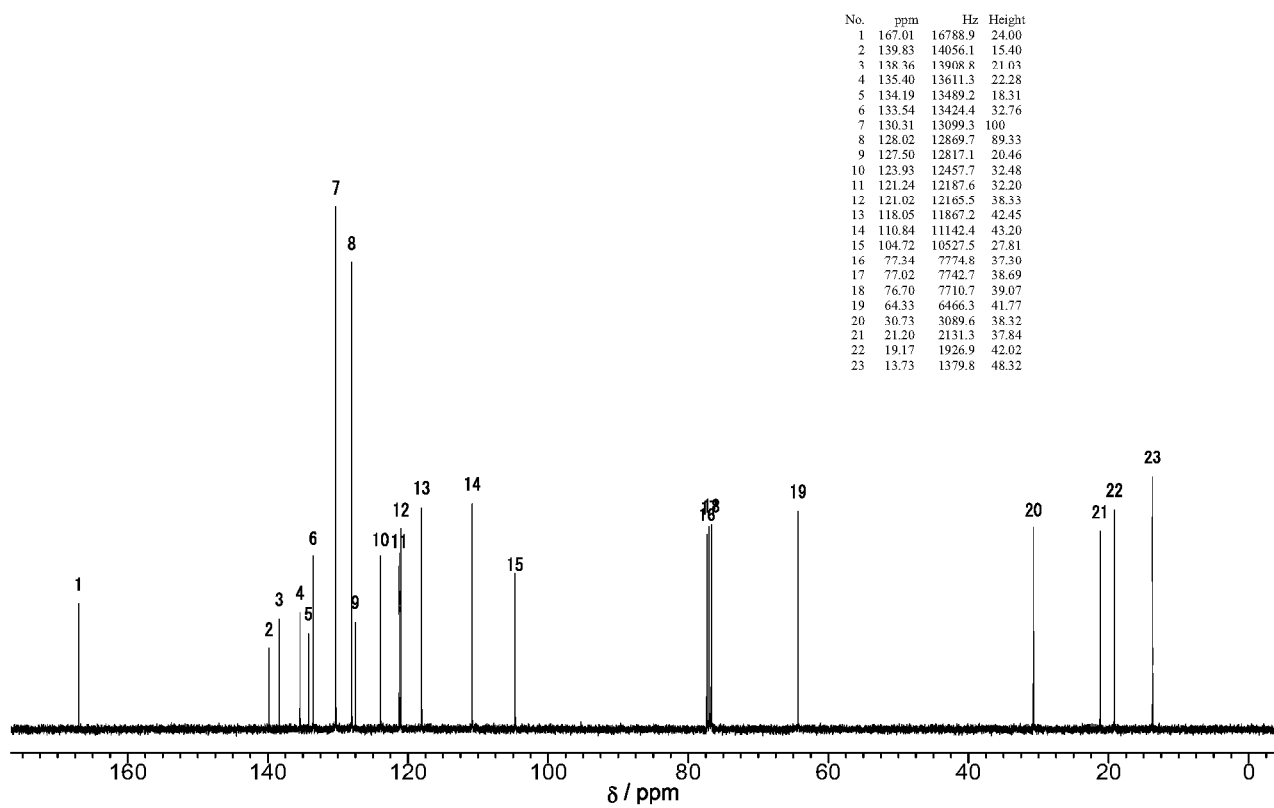



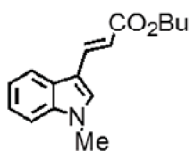

7a (CDCl<sub>3</sub>, 400 MHz)

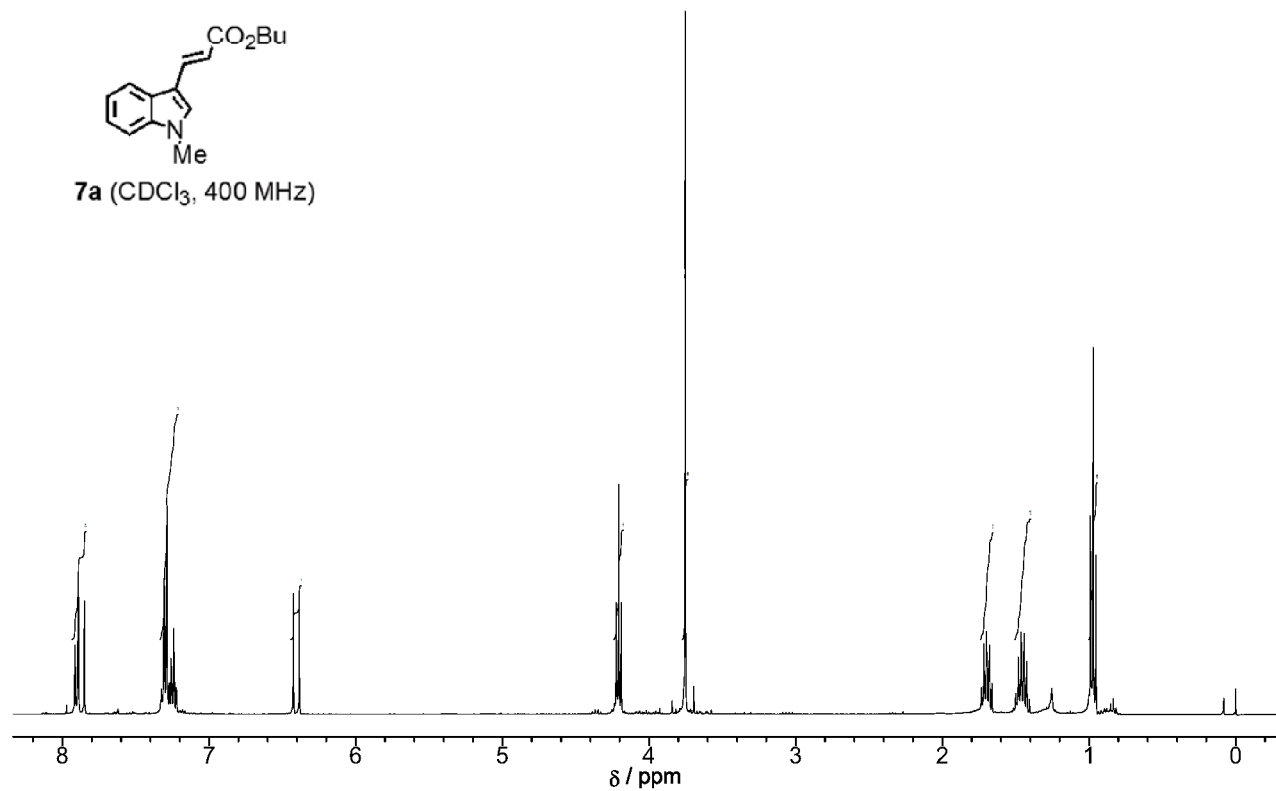

| No. | ppm    | Hz      | Height |
|-----|--------|---------|--------|
| 1   | 168.47 | 16768.5 | 32.26  |
| 2   | 138.08 | 13743.3 | 34.60  |
| 3   | 137.94 | 13729.6 | 48.17  |
| 4   | 133.11 | 13248.7 | 41.17  |
| 5   | 126.05 | 12546.2 | 35.49  |
| 6   | 122.94 | 12236.5 | 73.86  |
| 7   | 121.25 | 12068.3 | 59.01  |
| 8   | 120.58 | 12002.1 | 65.22  |
| 9   | 112.61 | 11208.3 | 62.54  |
| 10  | 112.09 | 11156.6 | 26.26  |
| 11  | 109.94 | 10942.7 | 77.63  |
| 12  | 77.39  | 7703.0  | 59.74  |
| 13  | 77.07  | 7671.0  | 60.16  |
| 14  | 76.75  | 7639.1  | 58.81  |
| 15  | 63.98  | 6368.1  | 91.98  |
| 16  | 33.10  | 3294.3  | 70.93  |
| 17  | 30.96  | 3081.2  | 100    |
| 18  | 19.27  | 1918.4  | 59.77  |
| 19  | 13.80  | 1373.4  | 86.14  |

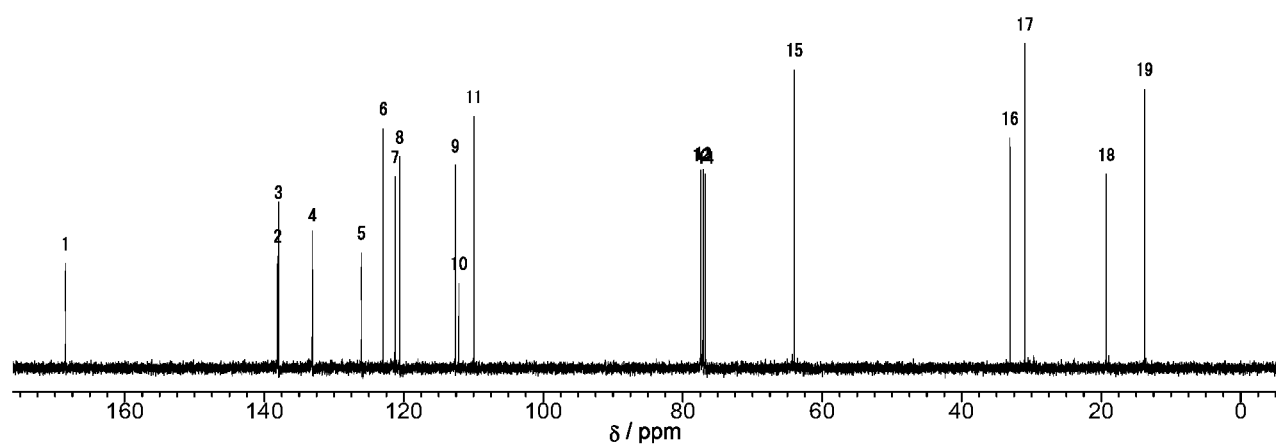

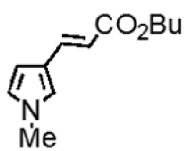

**7b** (CDCl<sub>3</sub>, 400 MHz)

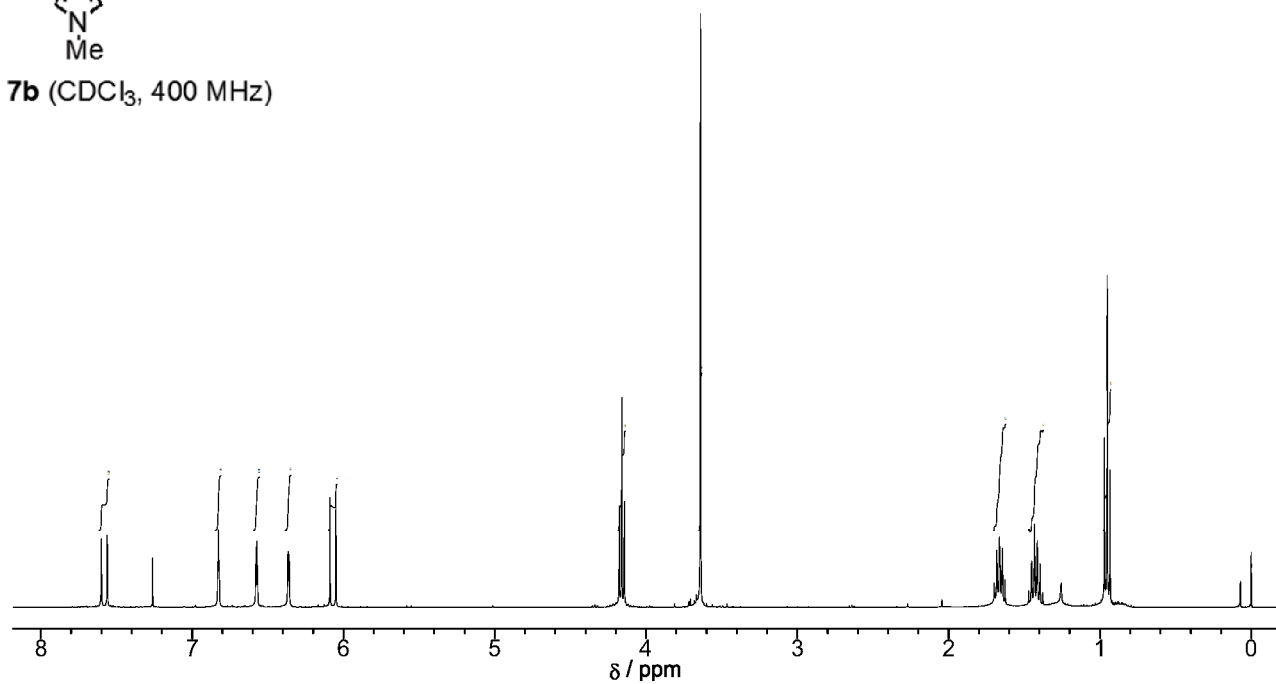

| No. | ppm    | Hz      | Height |
|-----|--------|---------|--------|
| 1   | 168.19 | 16907.2 | 33.98  |
| 2   | 138.73 | 13946.2 | 64.04  |
| 3   | 124.88 | 12553.8 | 53.57  |
| 4   | 123.80 | 12444.7 | 68.99  |
| 5   | 120.75 | 12138.8 | 18.25  |
| 6   | 112.75 | 11334.7 | 79.60  |
| 7   | 106.90 | 10745.7 | 100    |
| 8   | 77.32  | 7772.5  | 73.27  |
| 9   | 77.00  | 7740.5  | 75.17  |
| 10  | 76.68  | 7708.4  | 74.59  |
| 11  | 63.82  | 6416.0  | 53.50  |
| 12  | 36.33  | 3651.9  | 47.38  |
| 13  | 30.86  | 3102.5  | 69.30  |
| 14  | 19.20  | 1929.9  | 99.82  |
| 15  | 13.74  | 1381.4  | 65.54  |

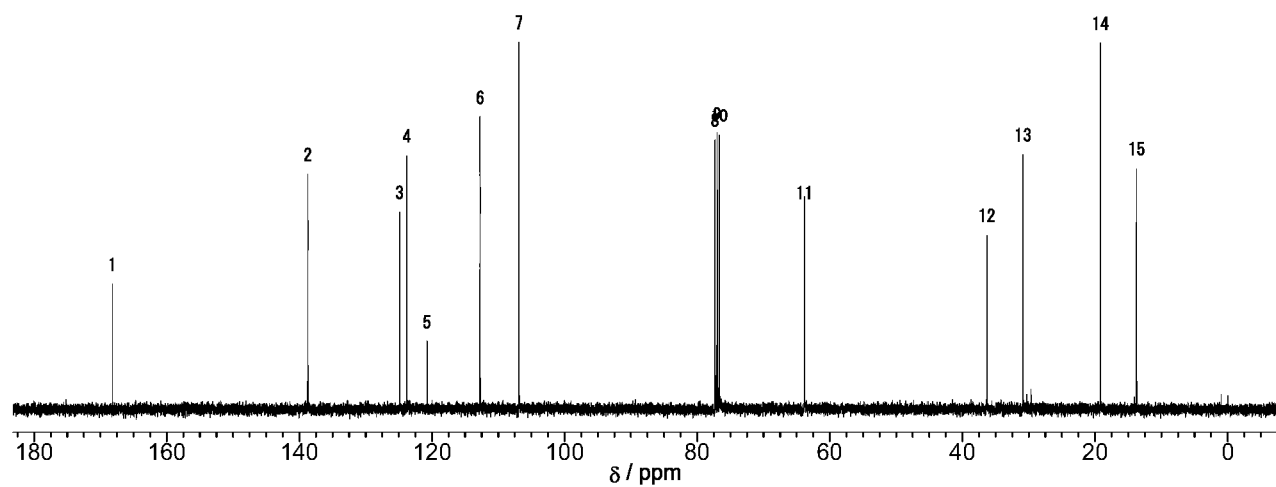

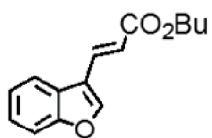

**7c** (CDCl<sub>3</sub>, 400 MHz)

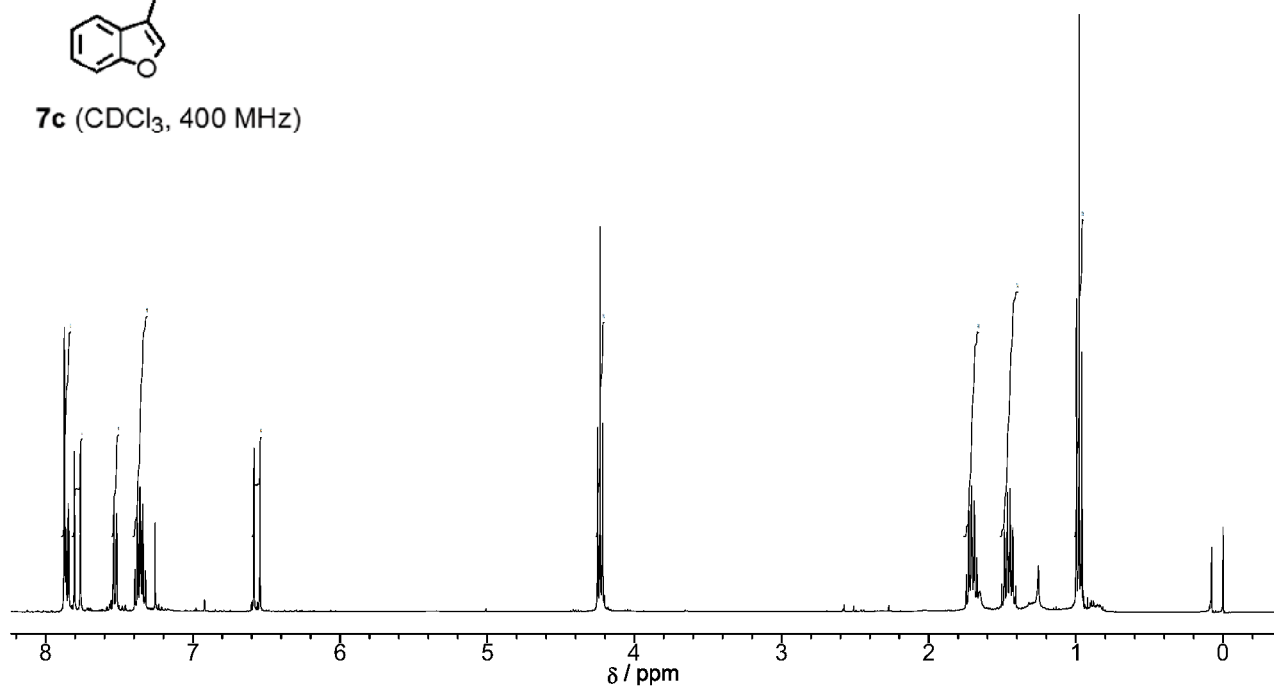

| No. | ppm    | Hz      | Height |
|-----|--------|---------|--------|
| 1   | 167.19 | 16641.4 | 34.14  |
| 2   | 156.12 | 15539.4 | 33.80  |
| 3   | 147.72 | 14703.0 | 74.94  |
| 4   | 134.35 | 13372.7 | 52.24  |
| 5   | 125.36 | 12477.7 | 67.25  |
| 6   | 124.80 | 12422.2 | 24.31  |
| 7   | 123.74 | 12316.4 | 73.48  |
| 8   | 121.02 | 12045.5 | 68.88  |
| 9   | 118.47 | 11792.0 | 62.17  |
| 10  | 117.89 | 11734.2 | 38.38  |
| 11  | 111.98 | 11145.9 | 91.26  |
| 12  | 77.34  | 7698.4  | 84.04  |
| 13  | 77.02  | 7666.5  | 86.78  |
| 14  | 76.70  | 7634.5  | 85.44  |
| 15  | 64.45  | 6415.3  | 50.45  |
| 16  | 30.80  | 3066.0  | 87.11  |
| 17  | 19.20  | 1911.5  | 100    |
| 18  | 13.74  | 1367.4  | 76.00  |

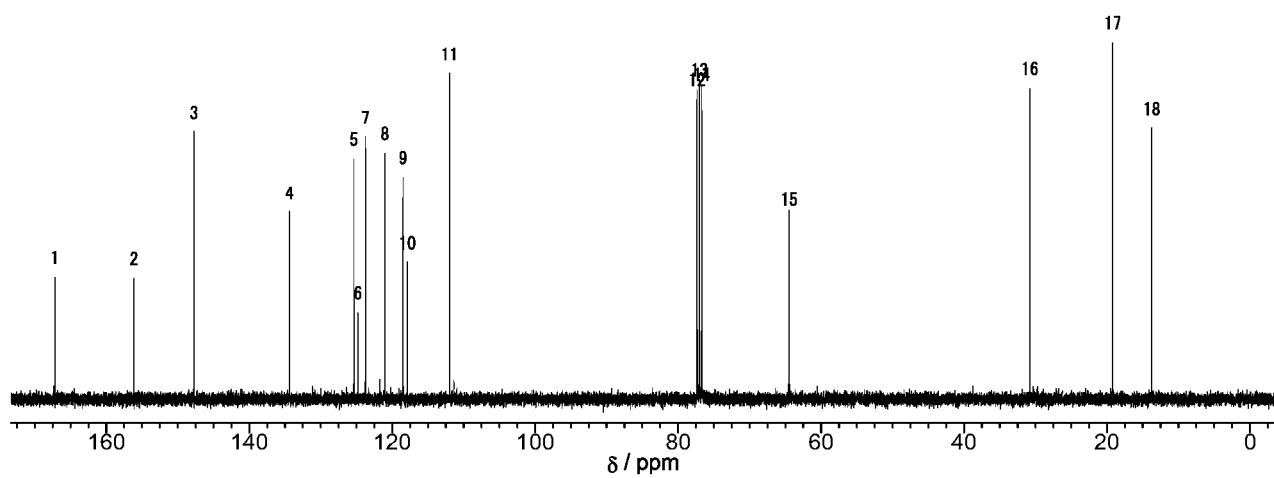

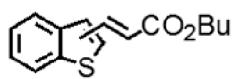

**7d** (CDCl<sub>3</sub>, 400 MHz)

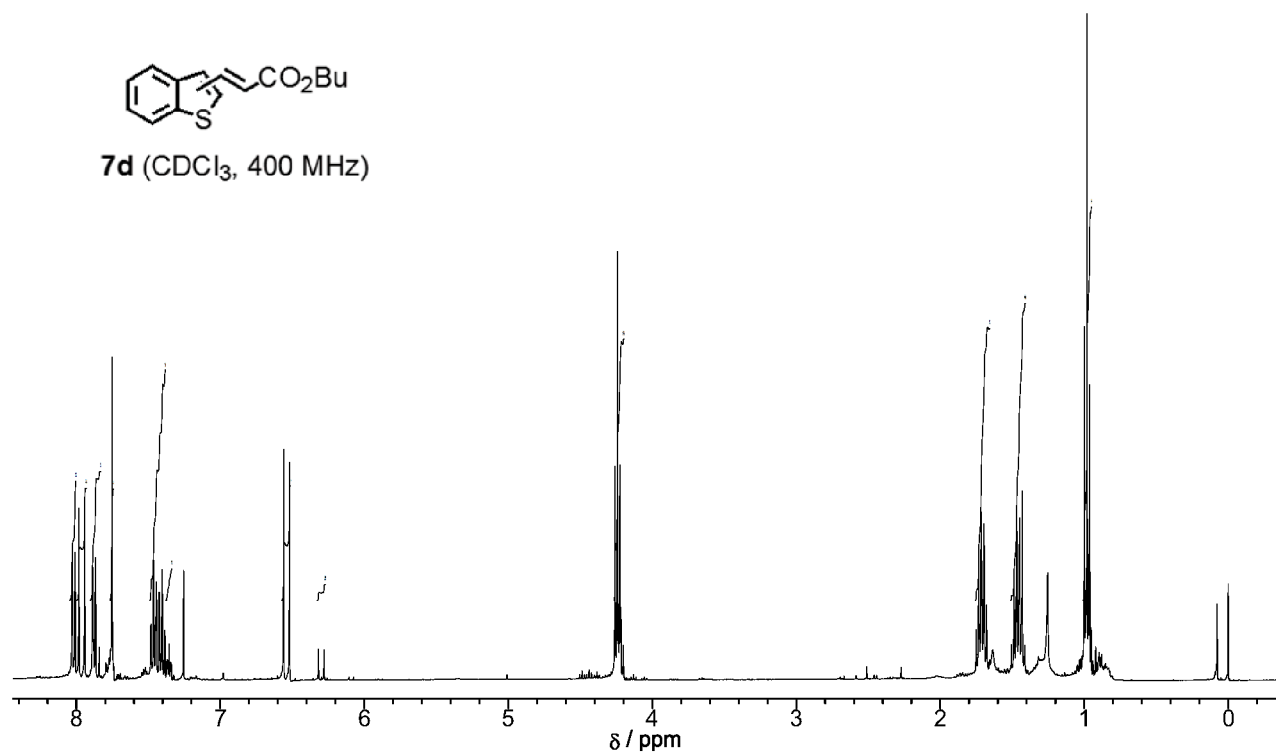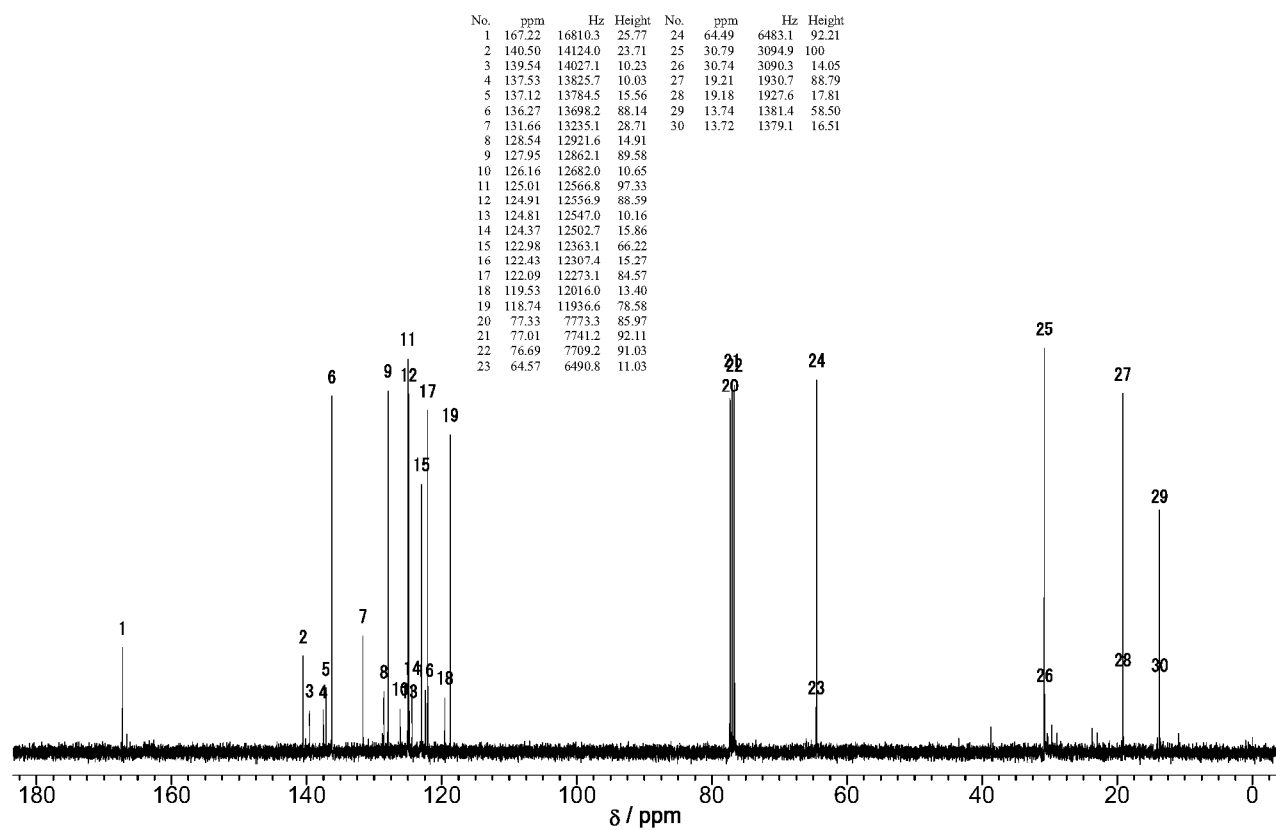

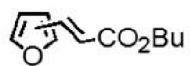

**7e** (CDCl<sub>3</sub>, 400 MHz)

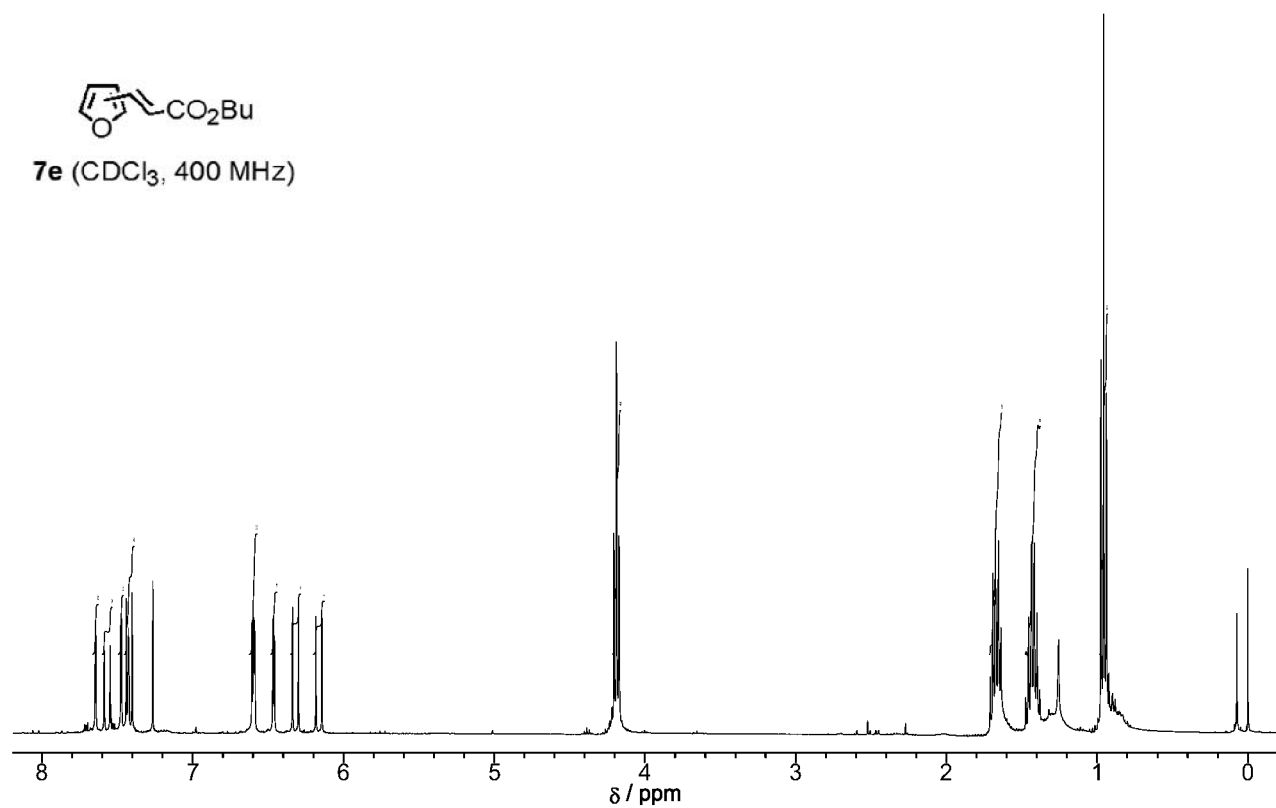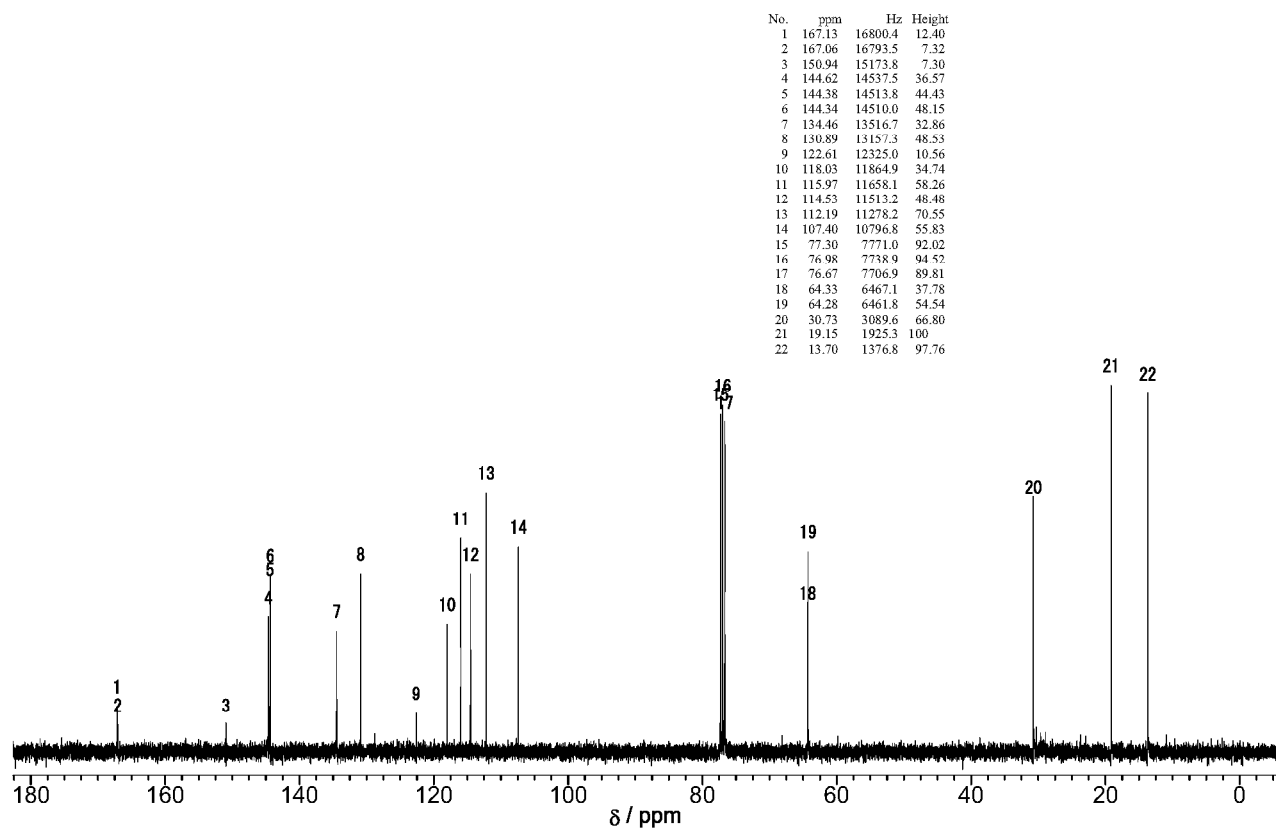

CCCCOC(=O)/C=C1C=CCS1  
**7f** (CDCl<sub>3</sub>, 400 MHz)

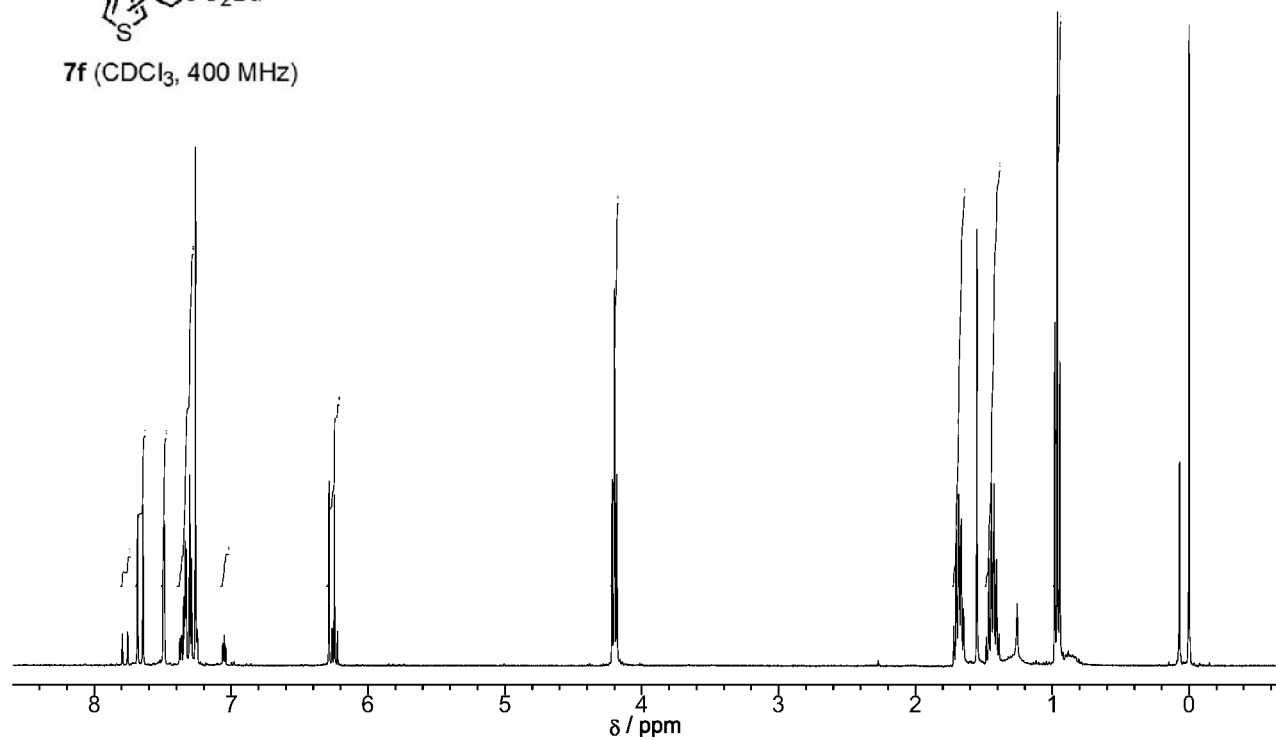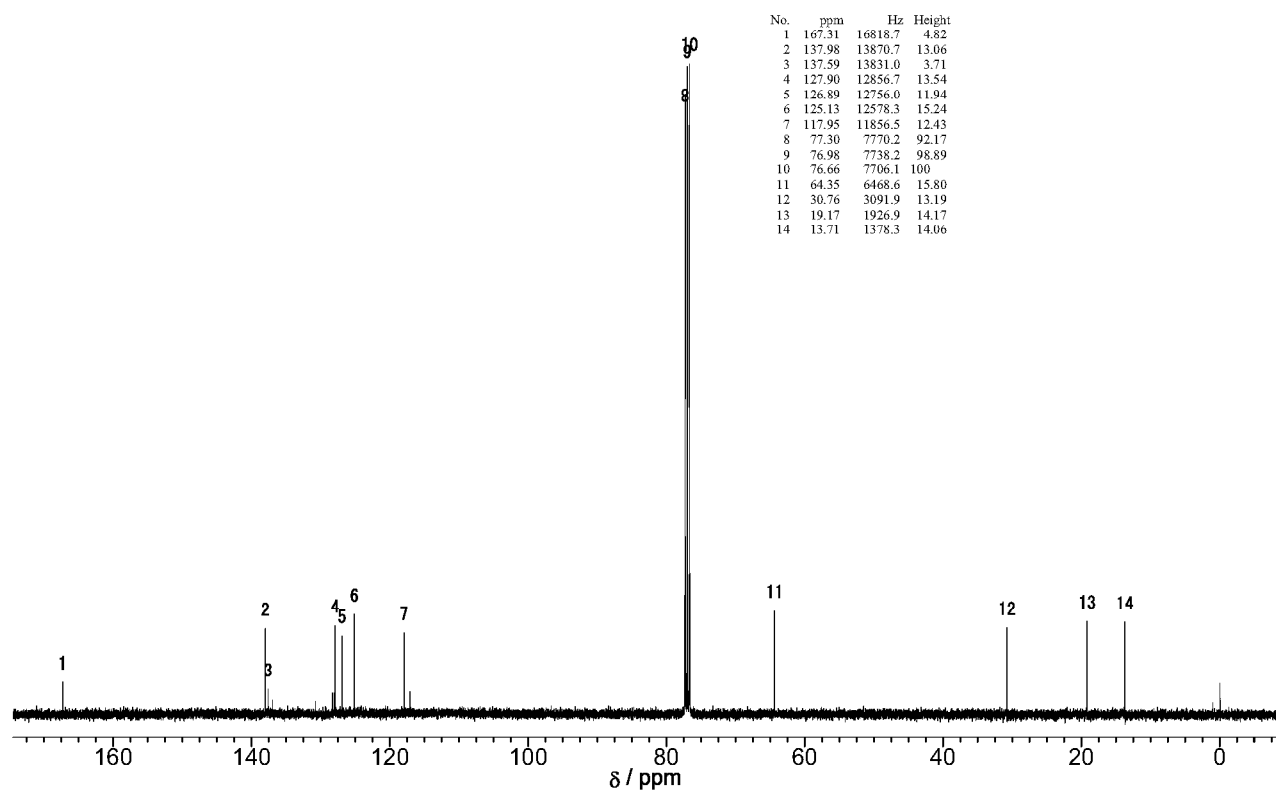

Supplement: Supplementary file 1 [file 4649257]
